# Supplementary material
Source: PubMed Central journal article supplement (PMC8713504)
Supplement: NIHMS683783-supplement-1.pdf [file NIHMS683783-supplement-1.pdf]

**SUPPLEMENTAL DATA**

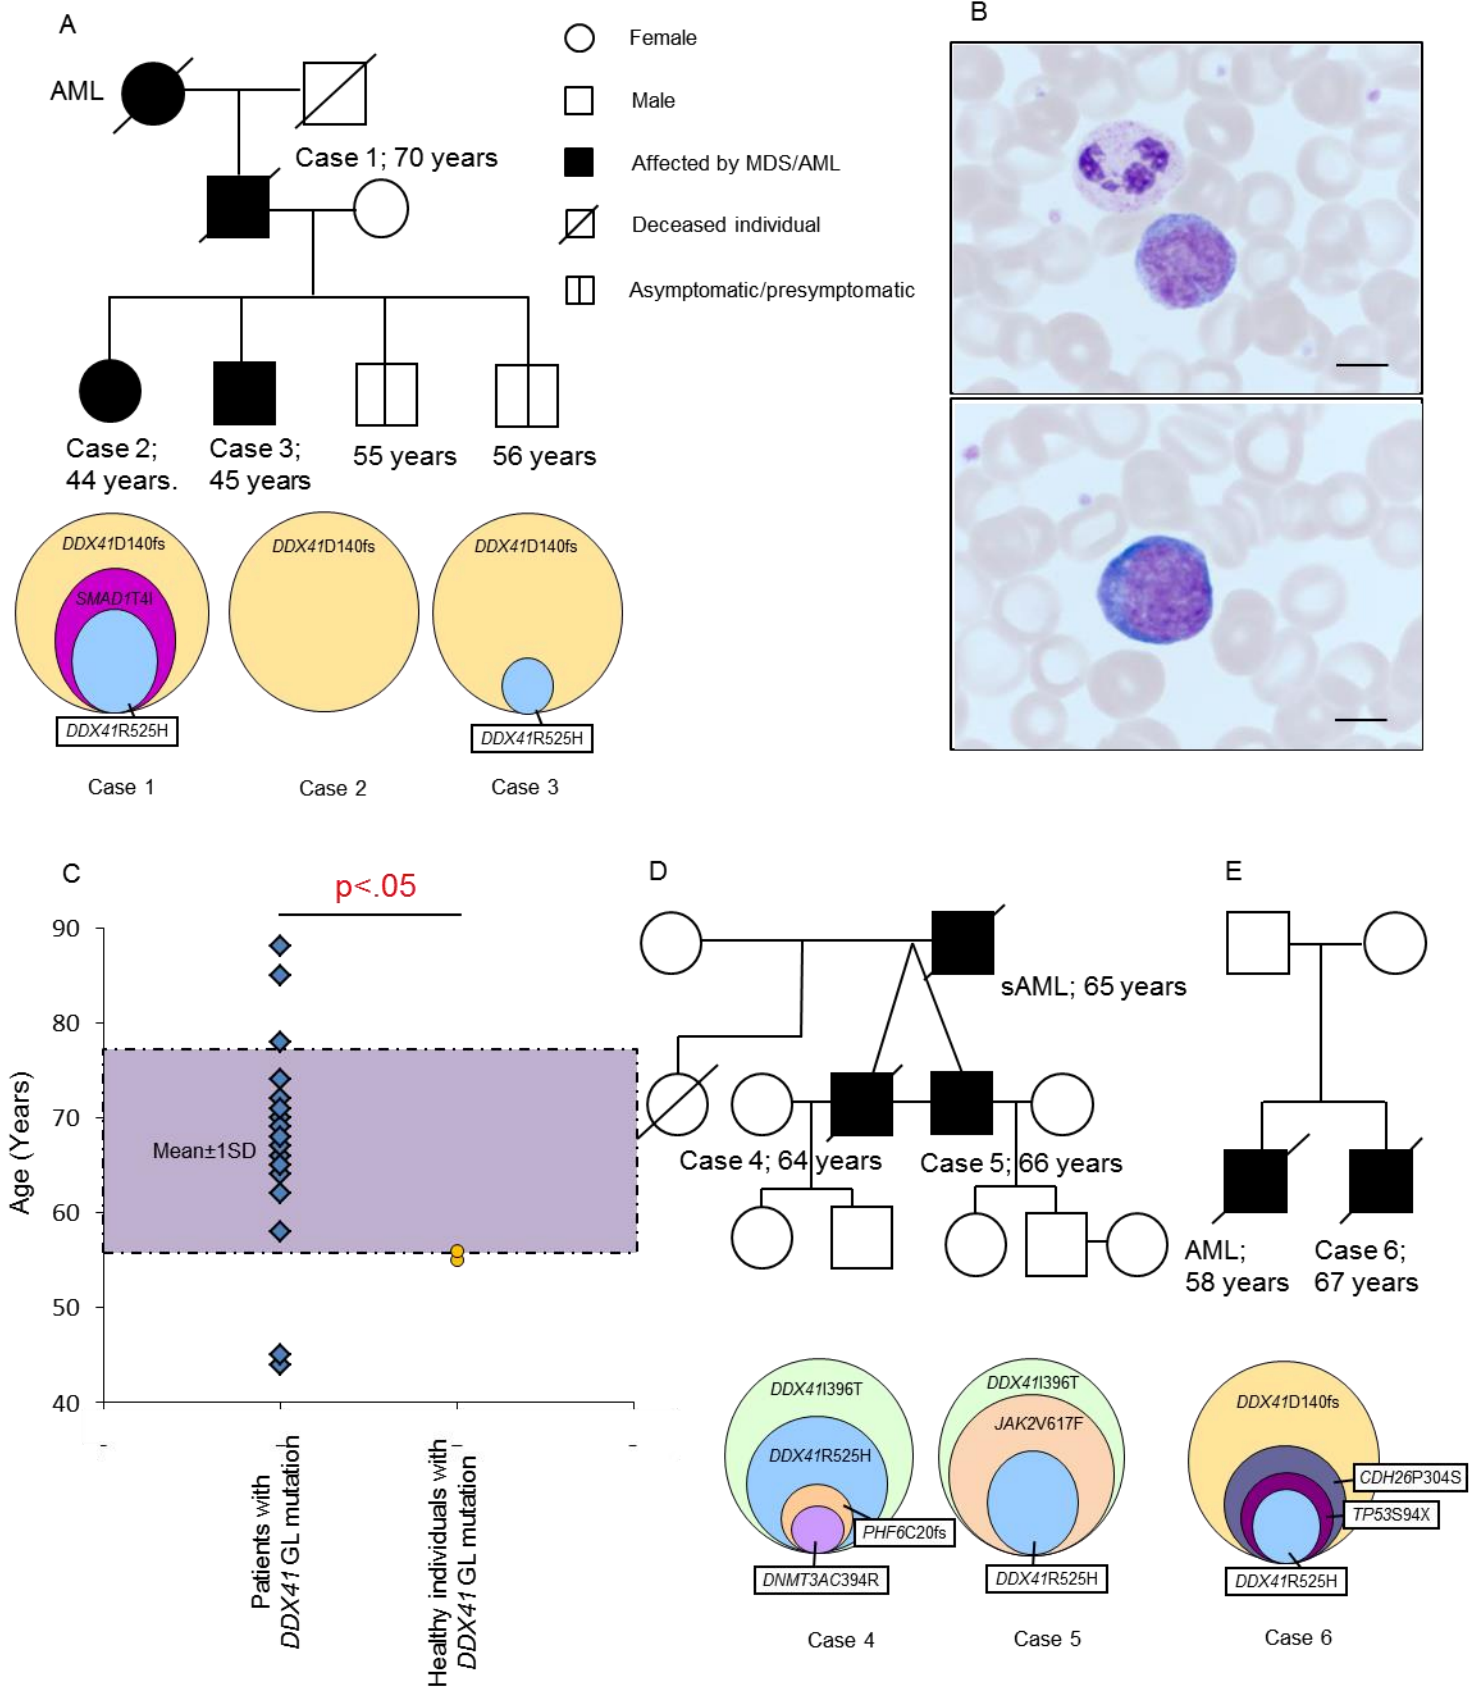

**Figure S1: Related to Figure 1.**

(A) Pedigree of family 1 depicts family members affected by AML or MDS and/or non-symptomatic or pre-symptomatic carriers. Case 1 and case 3 were affected by AML while case 2 was diagnosed with sAML. The paternal grandmother also died from AML. Case 1 harbored a germline mutation of *DDX41* (p.D140fs) and somatic mutations of *SMAD1* (p.T4I, 25%) and *DDX41* (p.R525H, 21%). Case 2 harbored germline mutation of *DDX41* (p.D140fs). Case 3 harbored germline mutation of *DDX41* (p.D140fs) and somatic mutation of *DDX41* (p.R525H, 12%). Frequencies of mutations are reflected by circle size. Case number is annotated according to Table 1. Asymptomatic/presymptomatic carrier-clinically unaffected at this time but could later exhibit symptoms.

(B) Peripheral blood smear of one healthy brother in family 1 contained immature-looking monocytes. Scale bar: 5  $\mu$ m

(C) Age of individuals with *DDX41* germline mutations. Pink area indicates the range (mean $\pm$ 1SD; 67 $\pm$ 11 years) of age at disease presentation in patients with *DDX41* germline mutation (each blue diamond represents one patient). Orange circles indicate age of the healthy family members harboring the germline mutation at the time of sequencing. (GL=germline)

(D) Family 2: The twins were diagnosed as MDS-RCMD. Their father died from sAML. Case 4 harbored germline mutation of *DDX41* (p.I396T) and somatic mutations of *DDX41* (p.R525H, 28%), *PHF6* (p.C20fs, 15%) and *DNMT3A* (p.C394R, 9.6%). Case 5 harbored germline mutation of *DDX41* (p.I396T) and somatic mutations of *JAK2* (p.V617F, 46%) and *DDX41* (p.R525H, 32%). Mutational frequencies are reflected by circle size.

(E) Family 3: Case 6 was diagnosed as MDS-RAEB-I. His brother died from leukemia. Leukemic cells showed germline mutation of *DDX41* (p.D140fs) and somatic mutations of *CDH26* (p.P304S, 37%), *TP53* (p.S94X, 22%) and *DDX41* (p.R525H, 20%). Mutational frequencies are reflected by circle size.

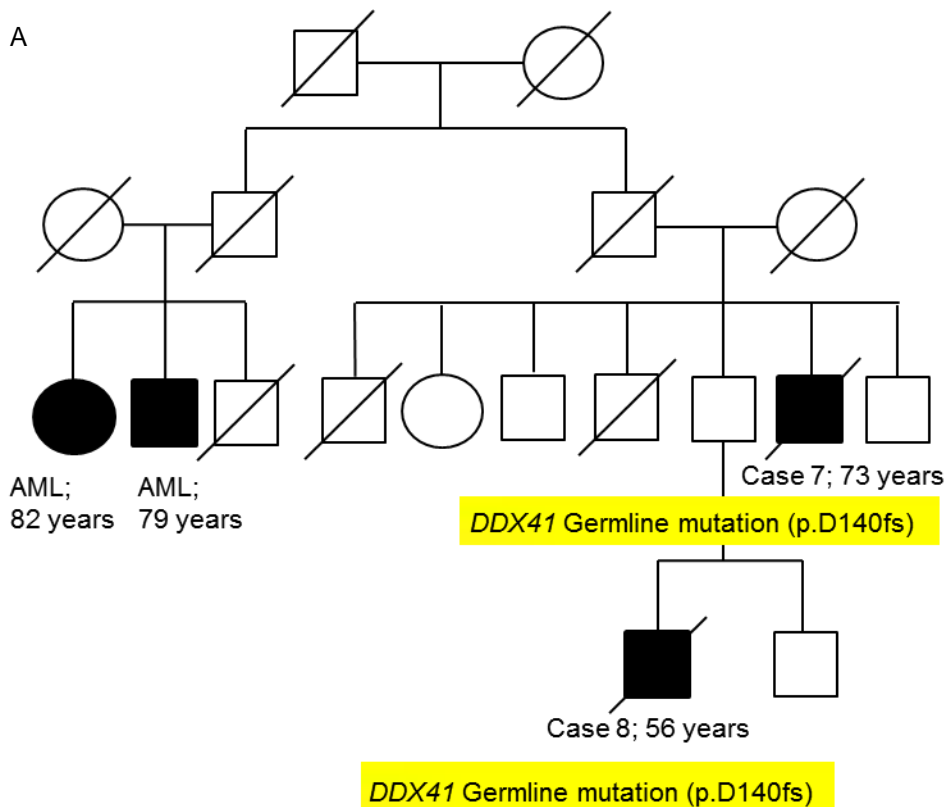

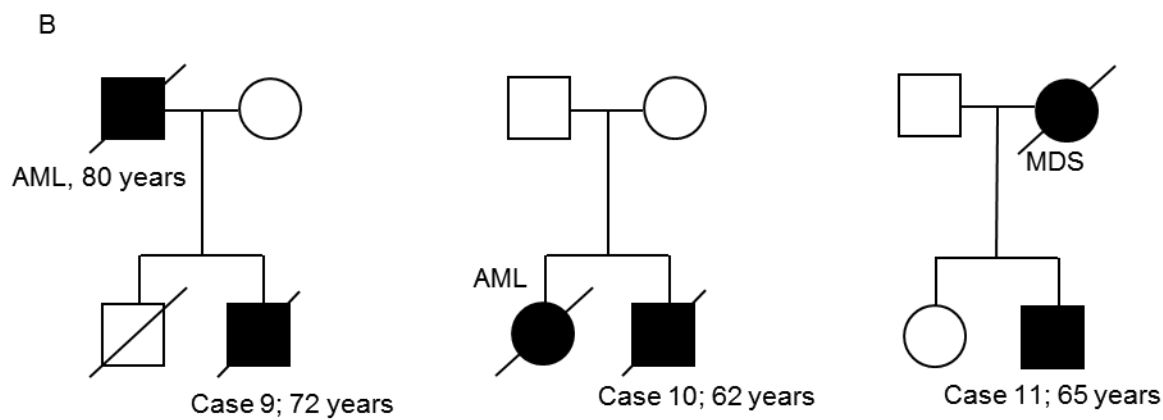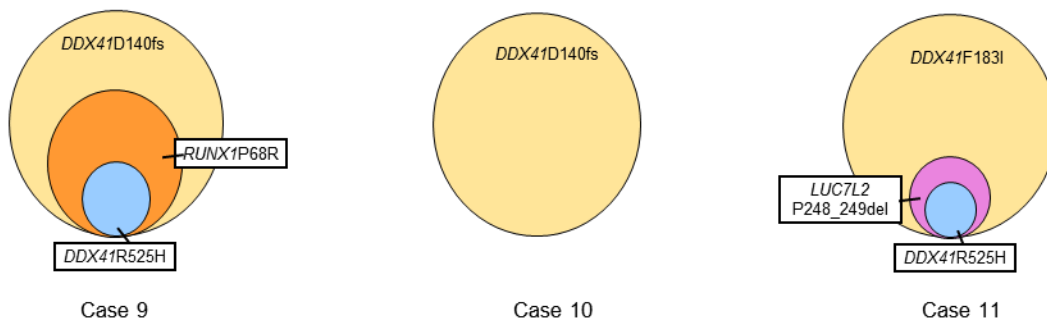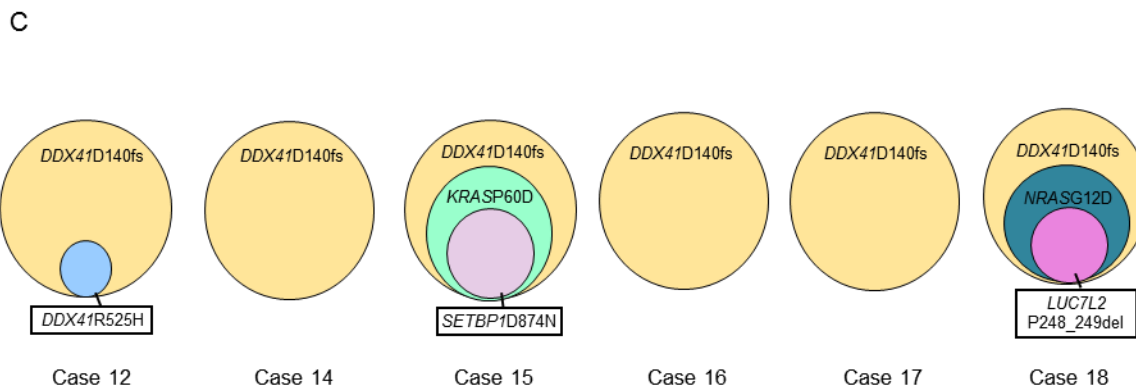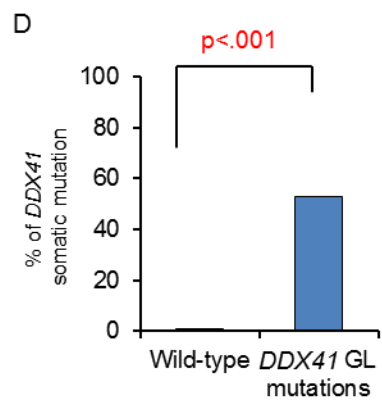

**E**

| Variants               | Population frequency |
|------------------------|----------------------|
| c.419insGATG, p.D140fs | 1/12,518             |
| c.T1187C, p.I396T      | Not reported         |
| c.C1200T               | 37%                  |

F

**DDX41 (Chr5: 176939748-176943967)**

Exon 11

Exon 15

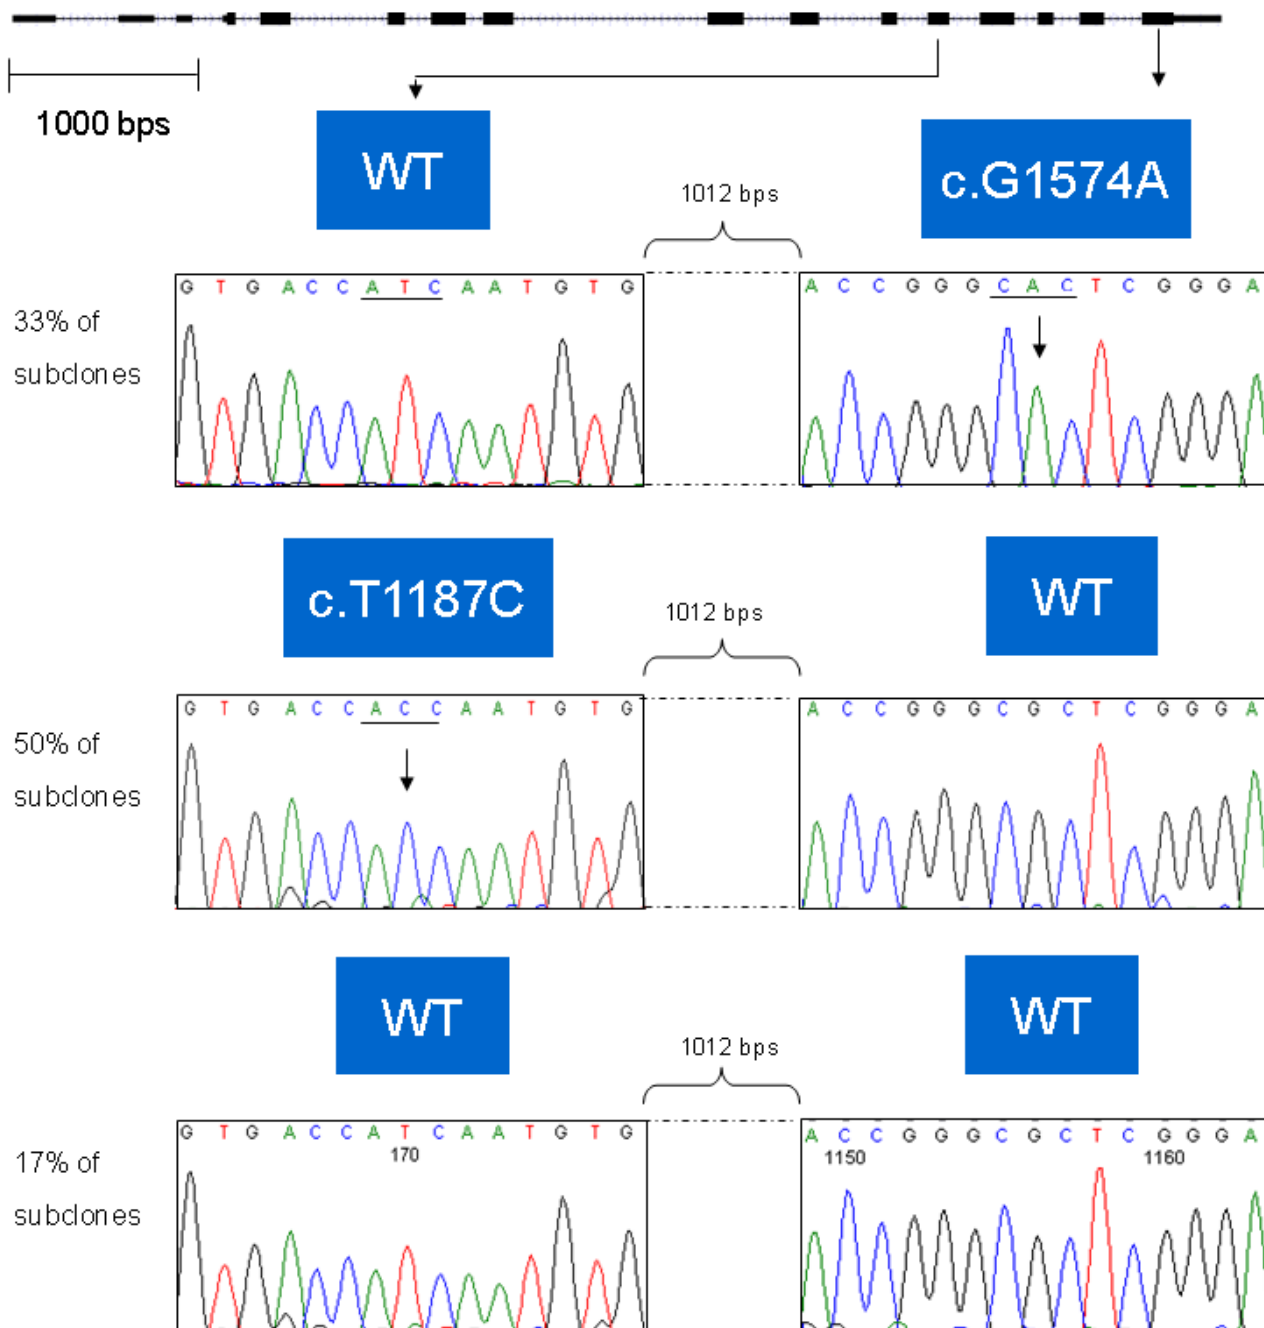

**Figure S2: Related to Table 1.**

(A) Family 4: Case 7 was diagnosed as sAML while his nephew (case 8) was diagnosed as pAML. Both cases harbored canonical *DDX41* germline mutation. Paternal cousins of the index case were also diagnosed with AML at the age of 79 and 89.

(B) Pedigrees indicate affected members of additional families. Case 9 was diagnosed with MDS-RAEB-I. His father died from leukemia. Leukemic cells showed germline mutation of *DDX41* (p.D140fs) and somatic mutations of *RUNX1* (p.P68R, 30%) and *DDX41* (p.R525H, 25.8%). Case 10 was diagnosed with MDS-RAEBII. His sister died from leukemia. Leukemic cells showed germline mutation of *DDX41* (p.D140fs). Case 11 was diagnosed with MDS-RAEB-I. His mother died from MDS. Leukemic cells showed germline mutation of *DDX41* (p.F183I) and somatic mutations of *LUC7L2* (p. 248\_249del, 9%) and *DDX41* (p.R525H, 5%).

(C) Other cases were identified to harbor the germline mutation (p.D140fs): Case 12 (sAML) showed germline mutation of *DDX41* (p.D140fs) and somatic mutation of *DDX41* (p.R525H, 11%). Case 14 (RAEB-I), case 16 (RAEB-I) and case 17 (pAML) showed germline mutation of *DDX41* (p.D140fs). Case 15 (CMML-1) showed germline mutation of *DDX41* (p.D140fs) and somatic mutation of *KRAS* (p.P60D, 30%) and *SETBP1* (p.D874N, 45%). Case 18 (sAML) showed germline mutation of *DDX41* (p.D140fs) and somatic mutation of *NRAS* (p.G12D, 47%) and *LUC7L2* (p. 248\_249del, 11.5%). Mutational frequencies are reflected by circle size.

(D) Germline alterations (p.D140fs, p.I396T, p.F183I and p.Q52fs) associated with somatic *DDX41* mutations (53%; 9/17), compared to those who showed wild-type germline configuration *DDX41* (0.8%; 8/1026,  $p < .001$ ). (GL=germline)

(E) Summary of population frequencies of the three *DDX41* variants

(F) Subcloning analysis of *DDX41* germline and somatic mutations (Family 2). Each *DDX41* allele was amplified by primers on exon 11 and 15 to include both loci of germline (p.I396T) and somatic (p.R525H) mutations. Sanger sequencing was performed for each subclone after TA cloning of amplicons into pCR2.1 vectors (n=6).

**Table S1: Related to Table 1. Classification of myeloid neoplasms in the analyzed cohort.**

| Diseases                     | WES | Targeted sequencing |
|------------------------------|-----|---------------------|
| MDS                          |     |                     |
| RCUD,RCMD,5q-,MDS-U,RARS     | 48  | 188                 |
| RAEBI/II                     | 27  | 115                 |
| MDS/MPN                      |     |                     |
| CMML                         | 25  | 68                  |
| JMML,aCML,MDS/MPN-U (RARS-T) | 15  | 53                  |
| MPN                          |     |                     |
| PV,PMF,ET                    | 5   | 45                  |
| AML                          |     |                     |
| Primary AML                  | 199 | 103                 |
| Secondary AML                | 22  | 132                 |
| Total                        | 341 | 704                 |

MDS indicated myelodysplastic syndrome; RCUD, refractory cytopenia with unilineage dysplasia; RCMD, refractory cytopenia with multilineage dysplasia; MDS-U, MDS unclassifiable; RARS, refractory anemia with ring sideroblasts; RAEB, refractory anemia with excess blasts; MDS/MPN, MDS/myeloproliferative neoplasms; CMML, chronic myelomonocytic leukemia; aCML, atypical chronic myeloid leukemia; JMML, juvenile myelomonocytic leukemia; RARS-T, RARS associated with marked thrombocytosis; PV, polycythemia vera; PMF, primary myelofibrosis; ET, essential thrombocythemia; and AML, acute myeloid leukemia.

A

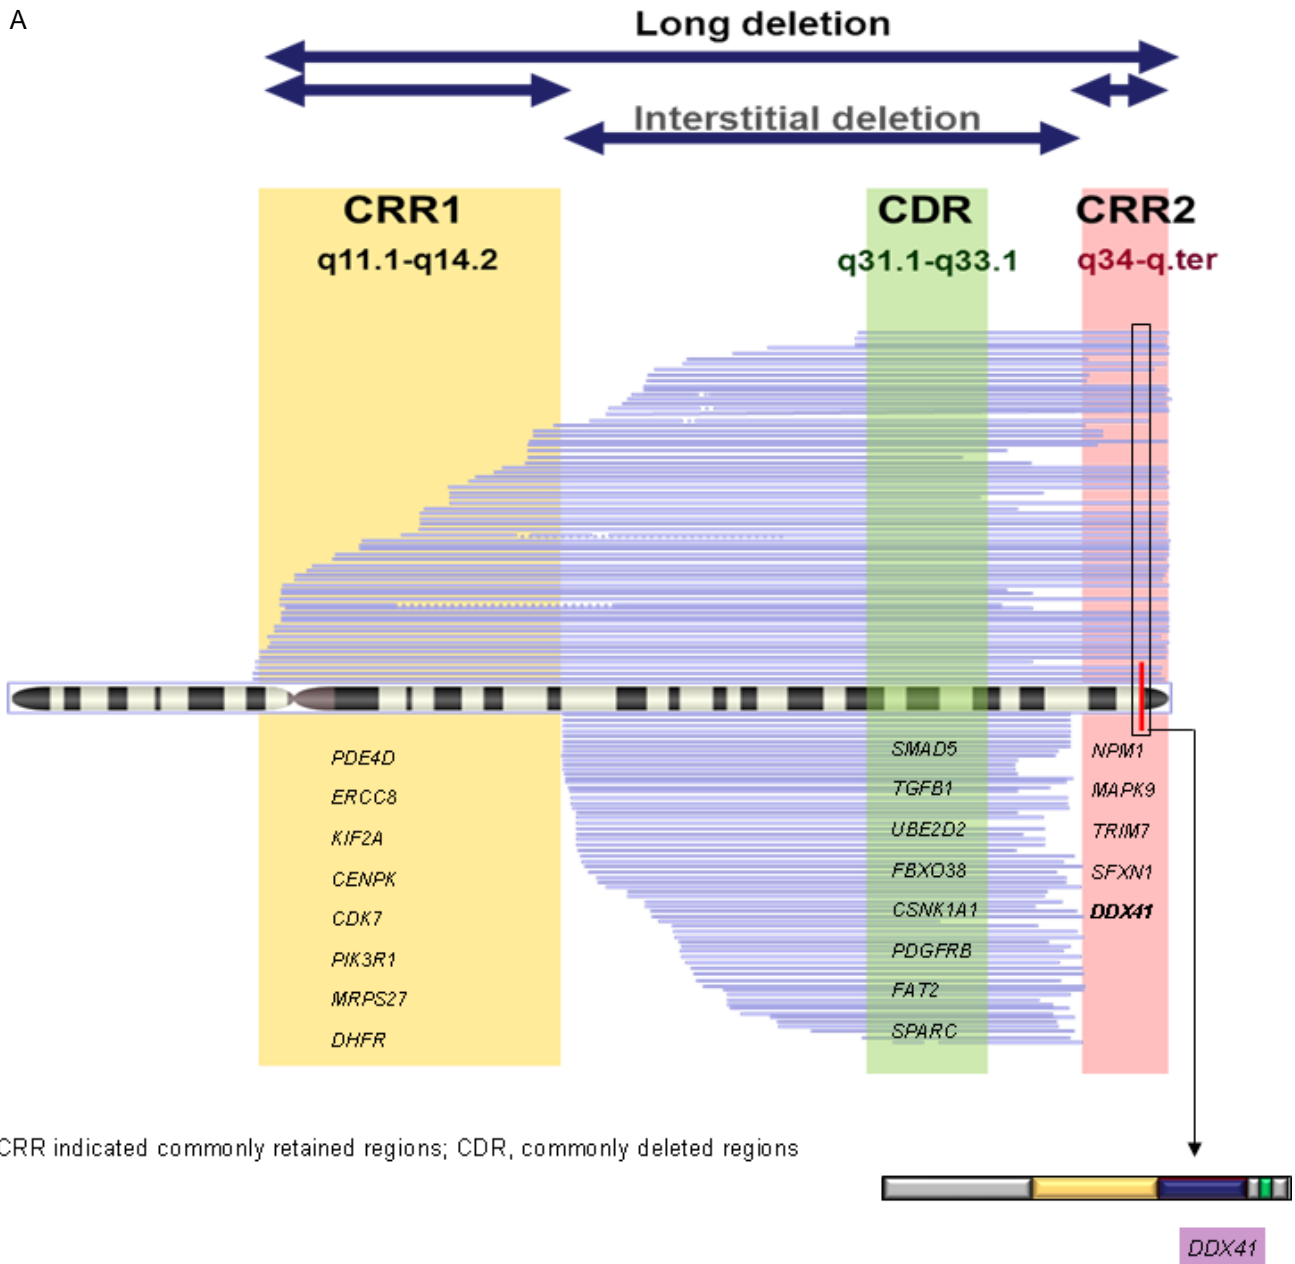

B

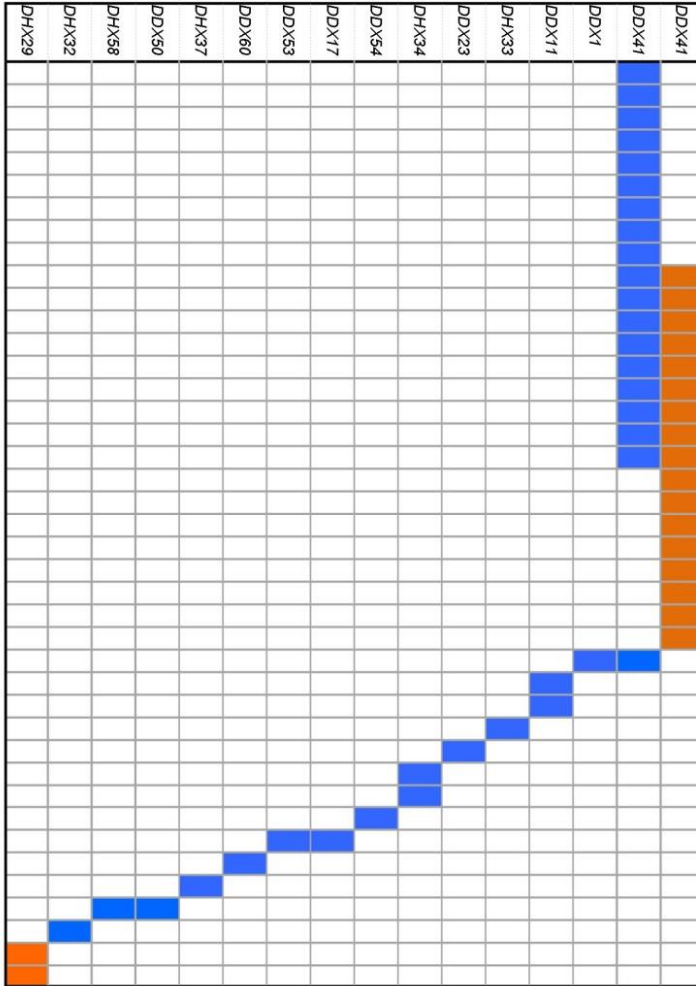

- Somatic mutation
- Germline mutations

| Genes        | Events                 |
|--------------|------------------------|
| <i>DDX1</i>  | Splice site (Exon15-2) |
| <i>DDX11</i> | p.A607P, p.A848V       |
| <i>DDX23</i> | p.R54Q                 |
| <i>DHX34</i> | p.T556A, p.V648I       |
| <i>DHX33</i> | p.A440V                |
| <i>DDX54</i> | p.T280M                |
| <i>DDX17</i> | Splice site (Exon5+1)  |
| <i>DDX53</i> | p.P41L                 |
| <i>DDX60</i> | p.I1676V               |
| <i>DHX37</i> | p.D180E                |
| <i>DDX50</i> | p.R726*                |
| <i>DHX58</i> | p.S412T                |
| <i>DHX32</i> | p.V81A                 |
| <i>DHX29</i> | p.V543M, p.E521K       |

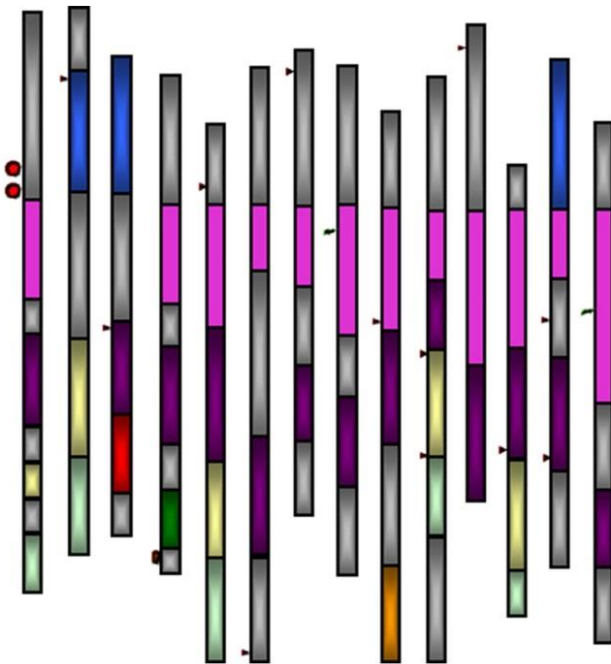

- ▲ Mutation at splice site
- ▲ Missense mutation
- Non-sense mutation
- Germline mutation
- Helicase ATP binding
- DEAD/H box
- ATP dependent helicase, C-terminal
- Helicase associated domain
- Domain of unknown function
- DBP
- GUCT
- C-terminal domain
- Zinc finger



**Figure S3: Related to Figure 2.**

(A) Shown are del(5q) cases in the analyzed cohort. Using SNP-A karyotyping, deletions of 5q were identified in 133 cases among myeloid neoplasms. The blue bars visualize deletions of 5q. Depicted are genes located in CRR1, CRR2 (commonly retained regions) and CDR (commonly deleted regions). Deletions of 5q involving the *DDX41* locus, which was located in CRR2, were present in 26% of del5q cases (n=35/133)

(B) Mutations and domain structure of other DEAD/H box RNA helicases in the analyzed cohort. We identified 15 somatic mutations of other members of DEAD/H-box RNA helicase family in the cohort with myeloid neoplasms (n=342), which were *DDX23*-R54Q, *DDX11*-A607P and A848V, *DHX33*-A440V, *DHX34*-T556A and V648I, *DDX1* (splice site; exon15-2), *DDX17* (splice site; exon5+1), *DDX50*-R726\*, *DDX53*-P41L, *DDX54*-T280M, *DDX60*-I1676V, *DHX32*-V81A, *DHX37*-D180E, *DHX58*-S412T. We also identified 2 rare germline events; *DHX29* c.G1627A (p.V543M) and c.G1561A (p.E521K), not found in the SNP database (ESP). Lower panel shows domain structures of DEAD/H box RNA helicase members.

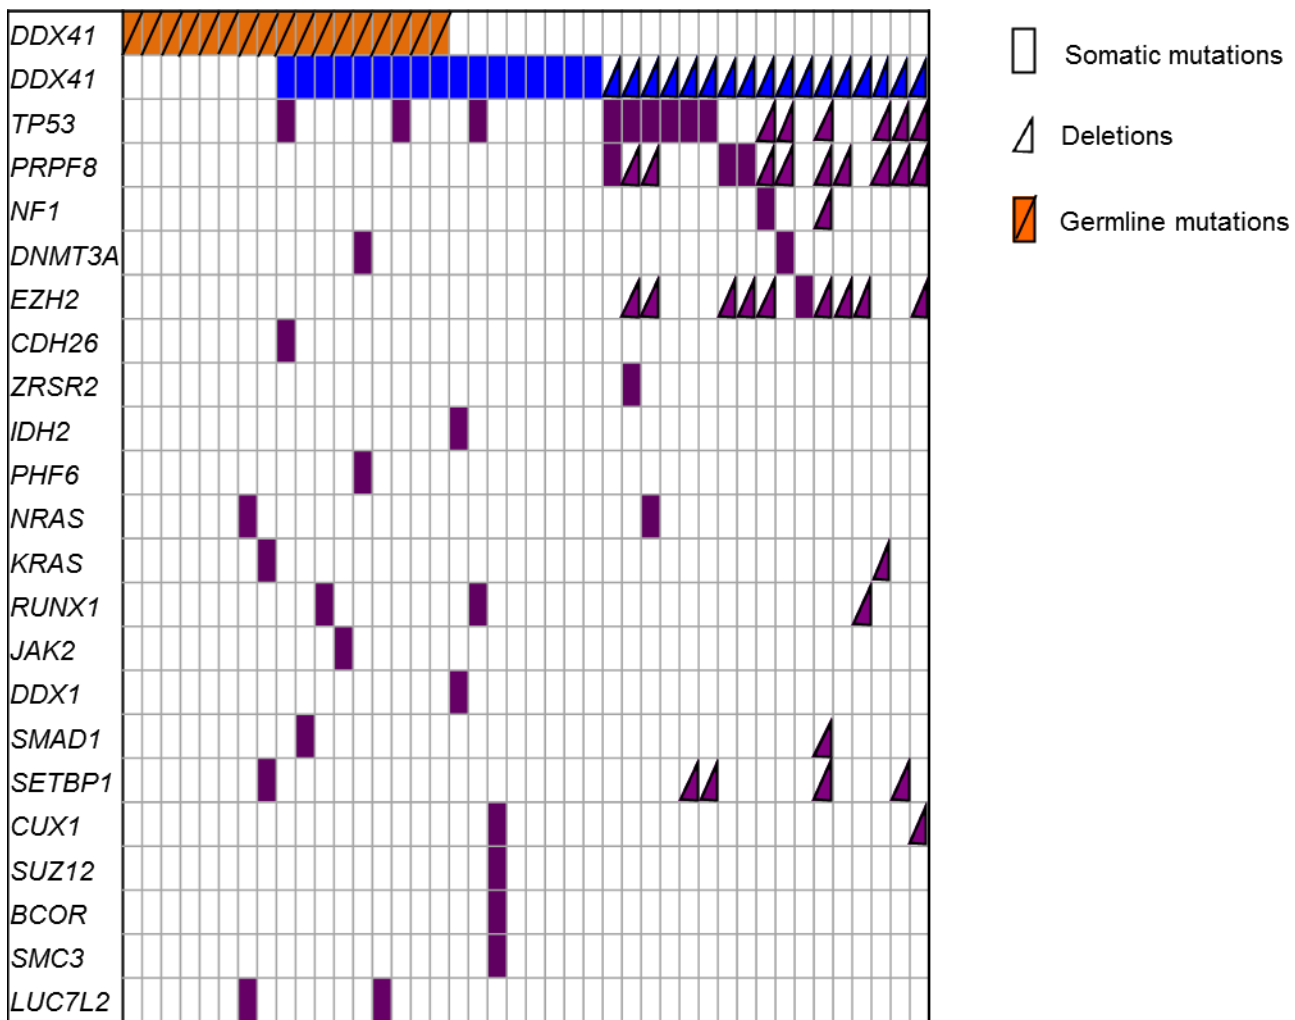

**Figure S4: Related to Figure 3.**

*DDX41* mutations, deletions and associated mutations. Seventeen cases harbored *DDX41* germline mutations (p.Q52fs, p.D140fs, p.M155I and p.I396T; indicated in orange), while somatic mutation of *DDX41* (indicated in blue) was found in 17 cases. Other mutations are indicated in purple. Seventeen deletion cases are shown as triangle.

**Table S2: Related to Figure 3. Characteristics of patients diagnosed with myeloid neoplasms and treated with lenalidomide.**

|                                  | Responders %<br>(n=63) | Non-responders %<br>(n=48) | p value |
|----------------------------------|------------------------|----------------------------|---------|
| <b>Age (years)</b>               | 66                     | 67                         |         |
| <b>Females</b>                   | 41                     | 29                         |         |
| <b>Median IPSS score</b>         | 0.5                    | 0.5                        |         |
| <b>Median R-IPSS score</b>       | 3.5                    | 3.5                        |         |
| <b>Cytogenetics at treatment</b> |                        |                            |         |
| Normal                           | 48                     | 48                         | 1       |
| Complex Karyotype                | 13                     | 27                         | 0.1     |
| Del5/5q                          | 31                     | 27                         | 0.8     |
| Del7/7q                          | 8                      | 14                         | 0.5     |
| Trisomy8                         | 13                     | 14                         | 1       |
| Del20/20q                        | 4                      | 17                         | 0.1     |
| <b>Diagnosis at treatment</b>    |                        |                            |         |
| Low-risk MDS                     | 57                     | 56                         | 1       |
| High-risk MDS                    | 25                     | 17                         | 0.4     |
| sAML                             | 2                      | 0                          | 1       |
| MDS/MPN                          | 11                     | 17                         | 0.4     |
| Primary Myelofibrosis            | 5                      | 6                          | 1       |

**Table S3: Related to Figure 3. Characteristics of 19 patients treated with lenalidomide showing *DDX41* mRNA expression level.**

| Cases | <i>DDX41</i> expression* | Lenalidomide response** | Disease     | Cytogenetics                         |
|-------|--------------------------|-------------------------|-------------|--------------------------------------|
| 1     | 0.27                     | Non-response            | RAEBI       | Normal                               |
| 2     | 0.97                     | Non-response            | RARS        | 47,XY,+8                             |
| 3     | 0.58                     | Non-response            | RAEBI       | Normal                               |
| 4     | 1.6                      | Non-response            | MDS/MPN     | Normal                               |
| 5     | 2.56                     | Non-response            | RAEBII      | Complex                              |
| 6     | 0.75                     | Non-response            | RARS        | Normal                               |
| 7     | 0.54                     | Non-response            | RCMD        | Complex                              |
| 8     | 1.42                     | Non-response            | CMML1       | Normal                               |
| 9     | 0.63                     | Non-response            | RCUD        | Normal                               |
| 10    | 0.5                      | Non-response            | MDS/MPN     | 46,XY,del(5)(q12q33),del(13)(q12q14) |
| 11    | 0.38                     | HI-E                    | PMF         | Normal                               |
| 12    | 0.62                     | BM-CR                   | RAEBI       | Normal                               |
| 13    | 0.43                     | BM-CR                   | RAEBI       | Normal                               |
| 14    | 0.27                     | HI-E,HI-N,HI-P          | RAEBII      | Complex                              |
| 15    | 0.42                     | BM-CR                   | RAEBII      | Normal                               |
| 16    | 0.42                     | HI-E                    | 5q-syndrome | 46,XX,del(5)(q13q33)                 |
| 17    | 0.78                     | HI-E                    | MDS/MPN     | Normal                               |
| 18    | 0.44                     | BM-CR                   | RAEBII      | Complex                              |
| 19    | 0.51                     | BM-CR                   | RAEBII      | Normal                               |

\*Level of *DDX41* is measured relatively to healthy bone marrow cells (1.00).

\*\*Response criteria are used according to the international working group response criteria for myelodysplastic syndromes. (Cheson et al., 2000)

HI-E: hematologic improvement-erythroid response, HI-N: hematologic improvement-neutrophil response, HI-P: hematologic improvement-platelet response, BM-CR: bone marrow evaluation-complete remission,

**Table S4: Related to Figure 3. Characteristics of *DDX41* mutants and wild-type.**

| Variables               | <i>DDX41</i> mutation | <i>DDX41</i> wild-type | p value* |
|-------------------------|-----------------------|------------------------|----------|
| <b>Number</b>           | 27                    | 1018                   |          |
| <b>Age (years)</b>      | 67                    | 65                     | ND       |
| <b>Male sex (%)</b>     | 92                    | 61                     | <0.05    |
| <b>Cytogenetics (%)</b> |                       |                        |          |
| Abnormal                | 30                    | 53                     | 0.0045   |
| Del5/5q                 | 8                     | 12                     | 1        |
| Trisomy 8               | 4                     | 9                      | 0.8      |
| <b>Diagnosis (%)</b>    |                       |                        |          |
| High-risk MDS           | 37                    | 17                     | 0.009    |
| Low-risk MDS            | 22                    | 29                     | 1        |
| pAML                    | 22                    | 11                     | 0.2      |
| sAML                    | 19                    | 18                     | 1        |

\*Fisher's exact test was used to determine p values, except where otherwise indicated. p values in multiple comparisons were evaluated by Bonferroni correction.

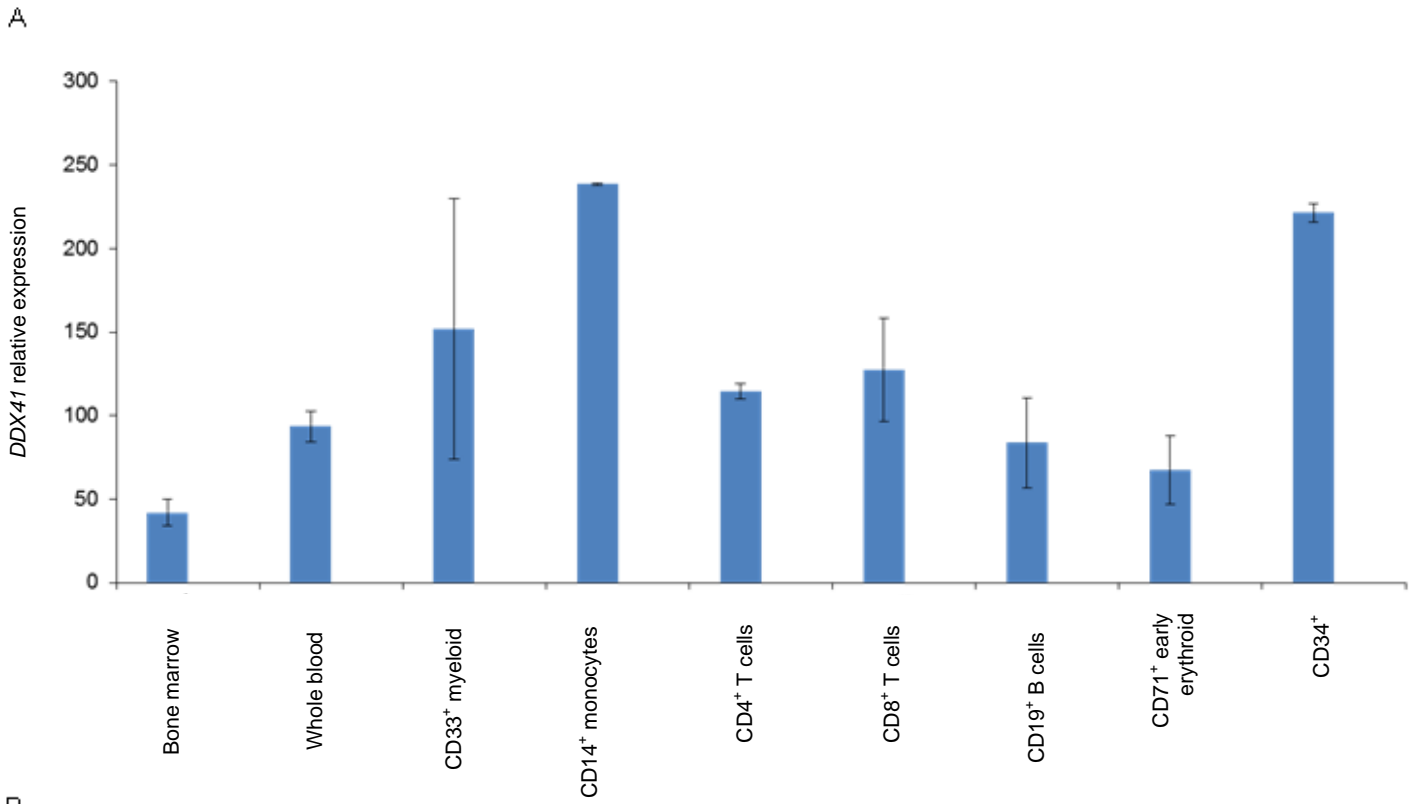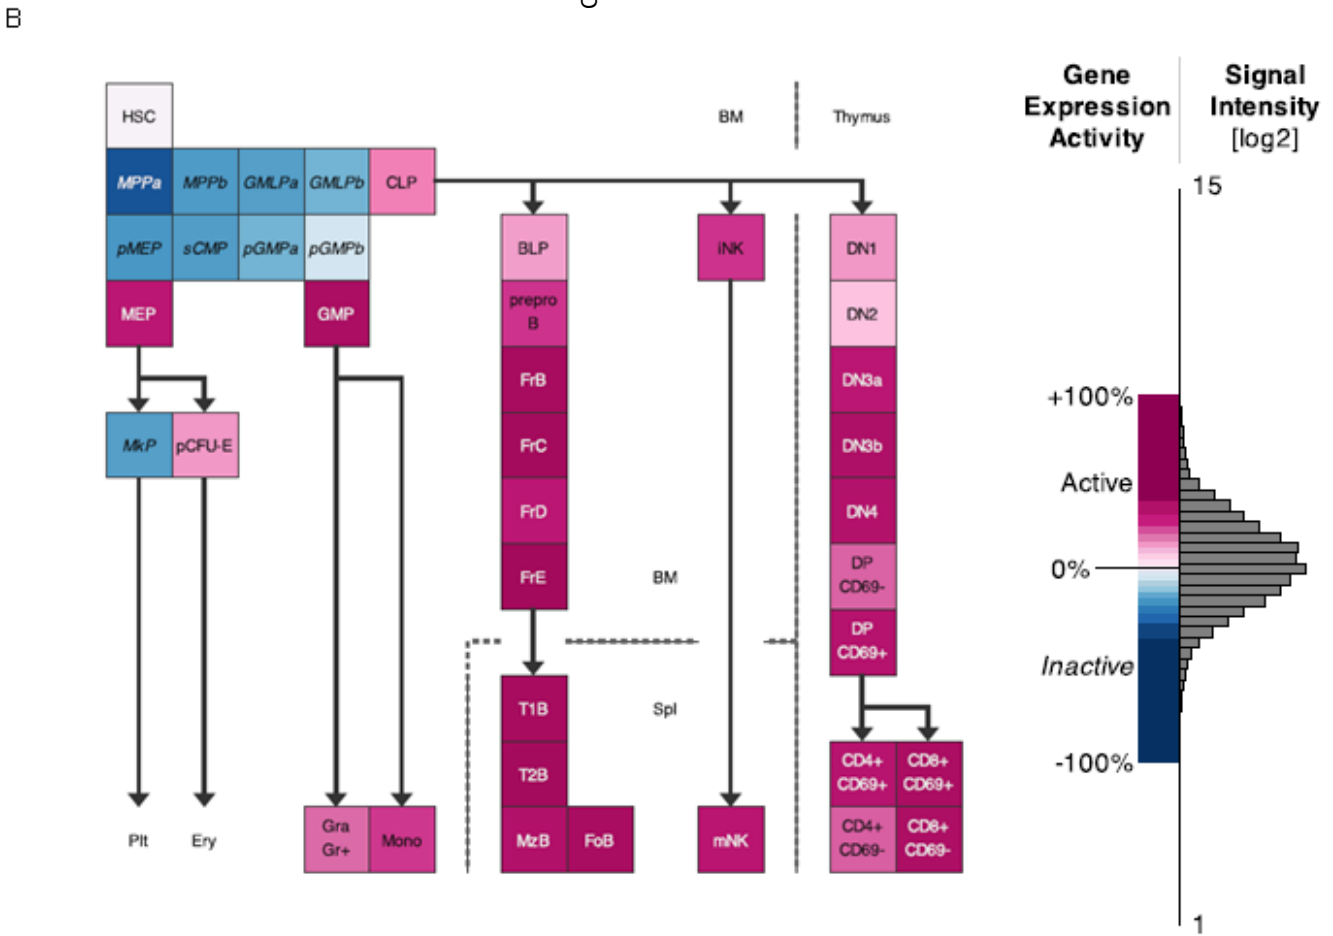

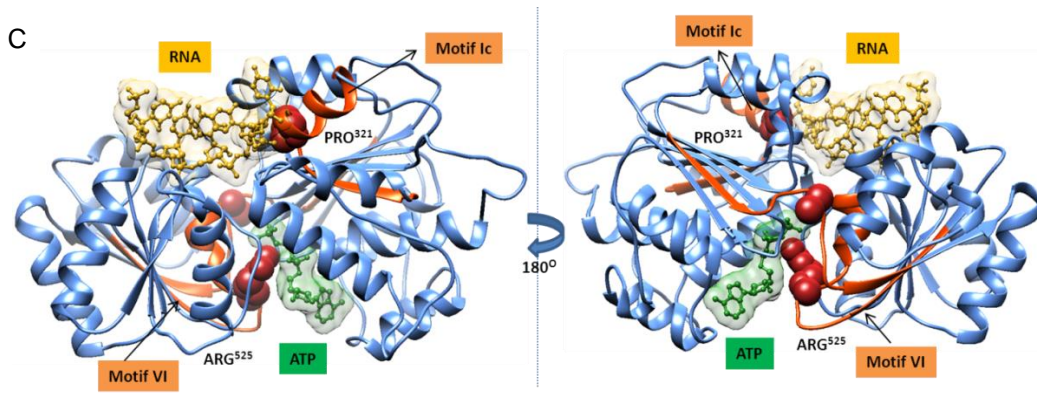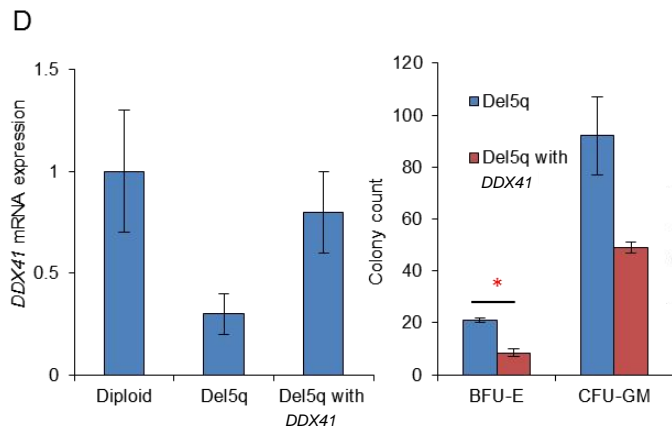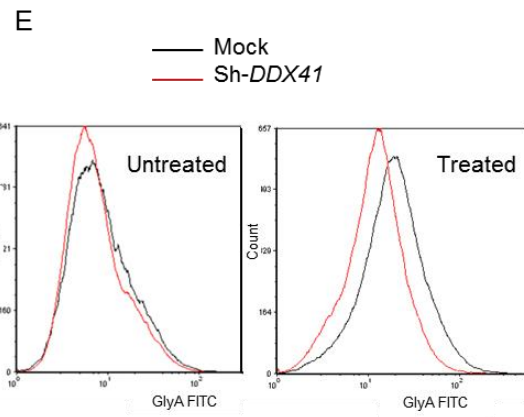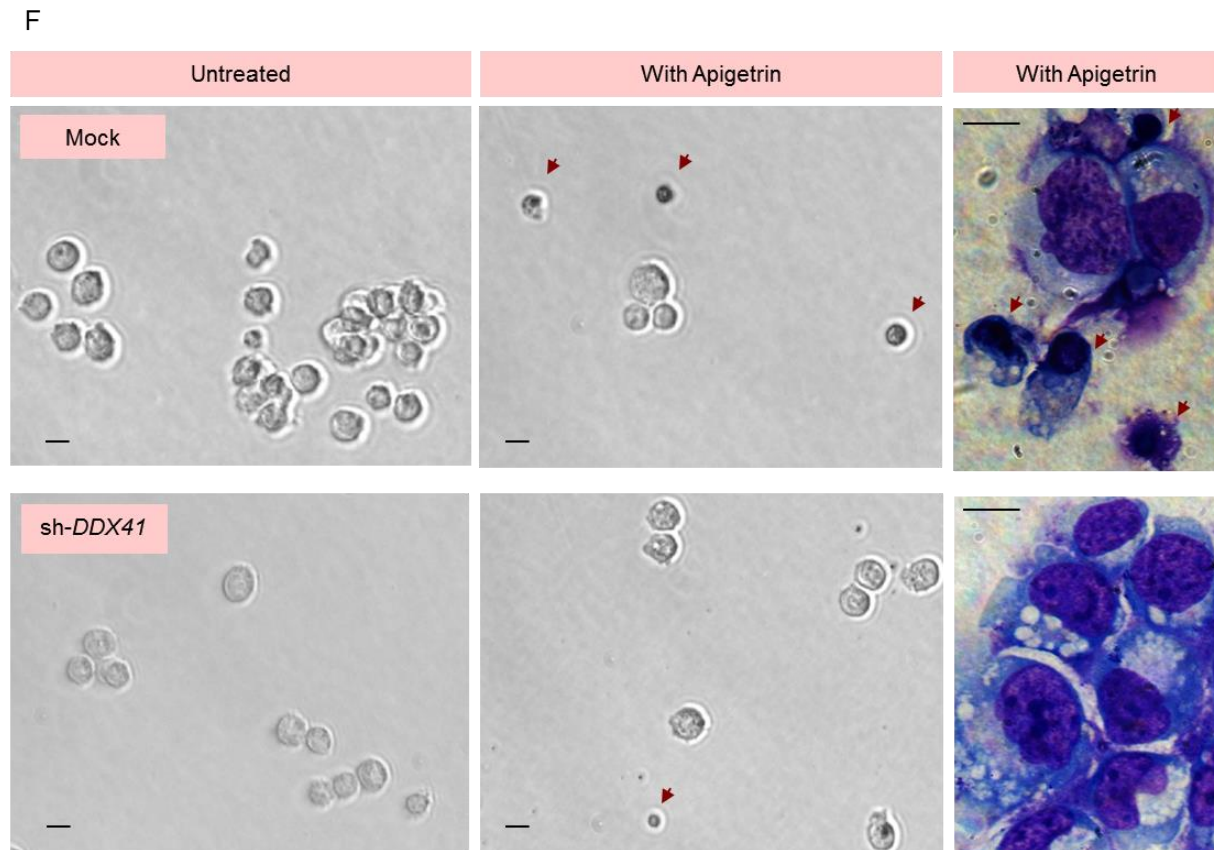

G

— U937 control  
 — U937 *DDX41* overexpression

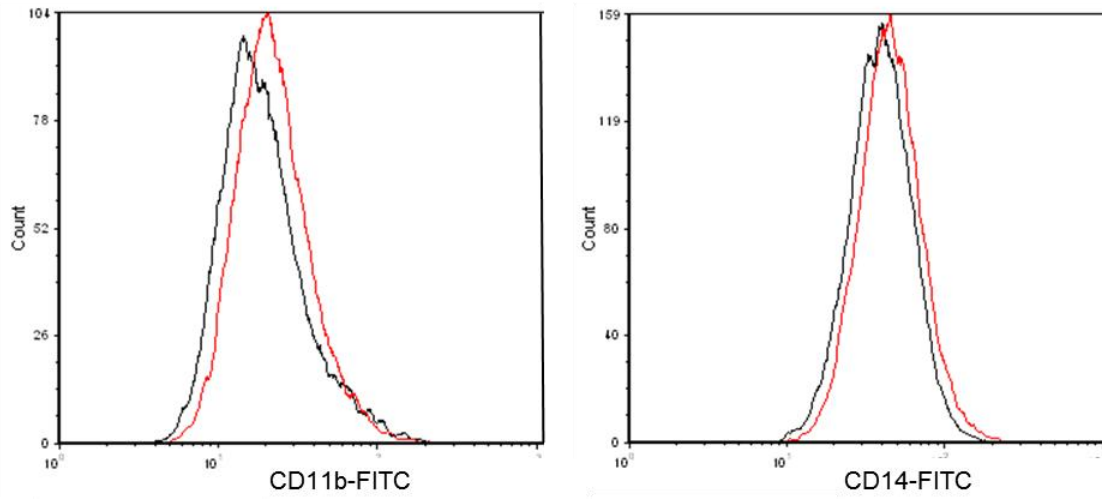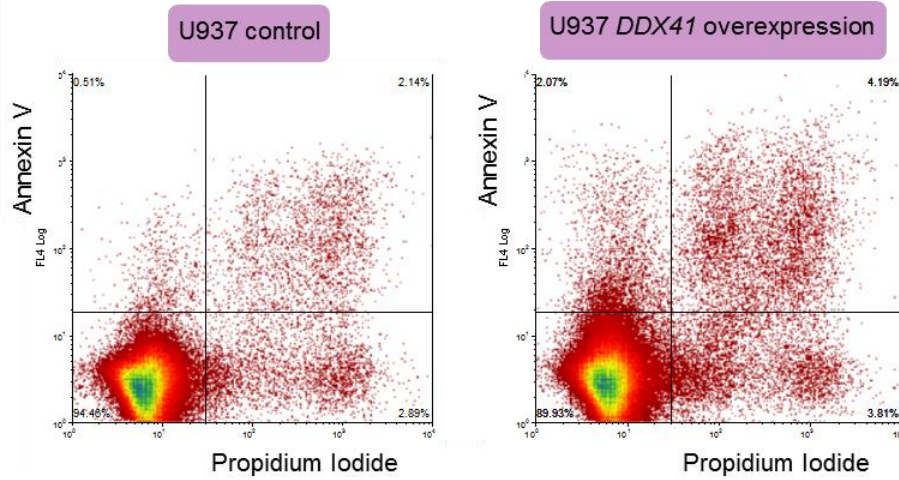

H

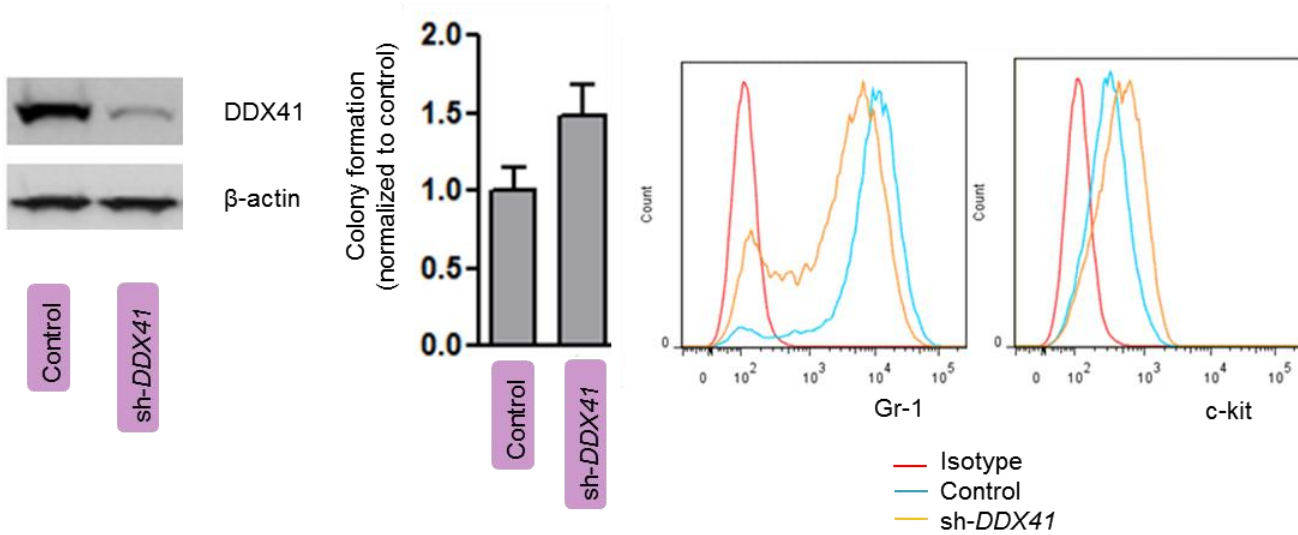



I

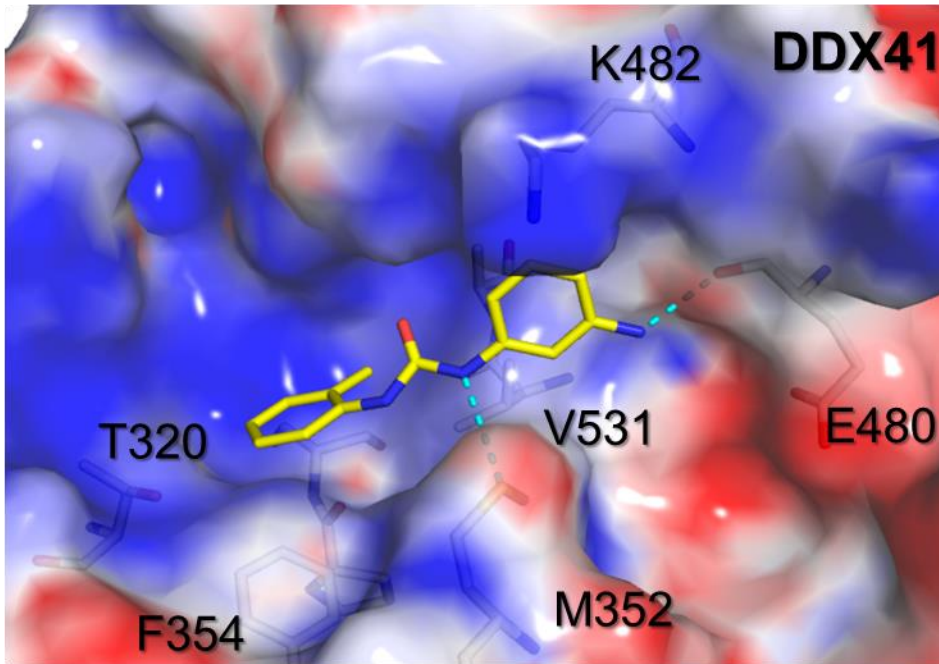

J

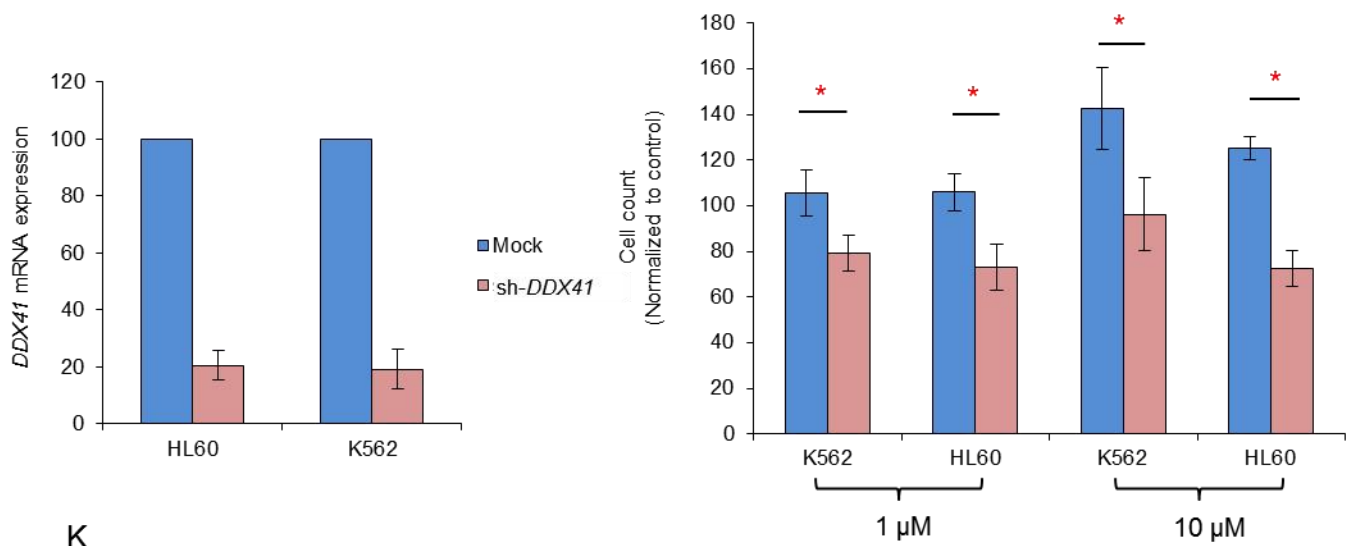

K

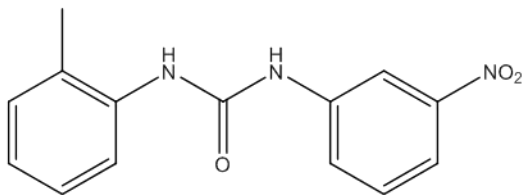



### Figure S5: Related to Figure 4.

(A) Expression of *DDX41* in various tissues was determined by normalization to *GAPDH*. Bone marrow cells: 41.9±8.1; Whole blood: 93.55±9.15; CD33<sup>+</sup> Myeloid cells: 151.85±77.95; CD14<sup>+</sup> Monocytes: 238.7±0.6; CD4<sup>+</sup> T cells: 114.55±4.85; CD8<sup>+</sup> T cells: 127.25±30.85; CD19<sup>+</sup> B cells: 83.75±27.05; CD71<sup>+</sup> early erythroid cells: 67.35±20.45; CD34<sup>+</sup> cells: 221.4±5.6. (<http://biogps.org>) Each bar represents the mean±SEM of 2 independent experiments.

(B) Gene expression values of *DDX41* in blood cells were analyzed via Gene Expression Commons; HSC (Hematopoietic stem cells): 5.63%; MPPa (multipotent progenitor subset A): -81.59%; MPPb (multipotent progenitor subset B): -55.69%; GMLPa (granulo/macrophage/lymphoid progenitor subset A): -53.15; GMLPb (granulo/macrophage/lymphoid progenitor subset B): -43.08; CLP (common lymphoid progenitor): 58.45%; pMEPa (pre megakaryocyte/erythroid progenitor): -57.52%; sCMP (strict common myeloid progenitor): -54.23%; pGMPa (pre granulocyte/macrophage progenitor subset A): -43.7%; pGMPb (pre granulocyte/macrophage progenitor subset B): -18.11%; MEP (megakaryocyte/erythroid progenitor): 85.62%; GMP (granulocyte/macrophage progenitor): 93.19%; MkP (megakaryocyte progenitor): -53.23%; pCFU-E (preCFU-E): 50.64%; Gra,Gr<sup>+</sup> (granulocyte): 63.47%; Mono (monocyte): 73.69%; BPLP (earliest B lymphocyte progenitor): 48.11%; preproB (pre pro B cells): 77.88%; FrB (fraction B B cells): 95.18%; FrC (Fraction C B cells): 96.21%; FrD (Fraction D B cells): 85.96%; FrE (Fraction E B cells): 97.26%; T1B (T1 B cells): 95.91%; T2B (T2 B cells): 96.16%; MzB (marginal zone B cells): 90.22%; FoB (follicular B cells): 94.58%; iNK (immediate natural killer cells): 77.48%; mNK (mature natural killer cell): 86.09%; DN1 (double negative T cell 1): 50.34%; DN2 (double negative T cell 2): 35.23%; DN3a (double negative T cell 3a): 85.25%; DN3b (double negative T cell 3b): 91.13%; DN4 (double negative T cell 4): 89.62%; DP CD69<sup>-</sup> (double positive CD69<sup>-</sup> T cell): 65.44%; DP CD69<sup>+</sup> (double positive CD69<sup>+</sup>): 88.51%; CD4<sup>+</sup>CD69<sup>+</sup> (CD4<sup>+</sup>CD69<sup>+</sup> T cell): 87.58%; CD4<sup>+</sup>CD69<sup>-</sup> (CD4<sup>+</sup>CD69<sup>-</sup> T cell): 66.64%; CD8<sup>+</sup>CD69<sup>+</sup> (CD8<sup>+</sup>CD69<sup>+</sup> T cell): 93.73%; CD8<sup>+</sup>CD69<sup>-</sup> (CD8<sup>+</sup>CD69<sup>-</sup> T cell): 92.90%. (<https://gexc.stanford.edu>)

(C) Structural model of the helicase core of *DDX41*. Mutations in the helicase core (p.R525H and p.P321L) are highlighted in orange. The structure model was created by combining the existing structure of the partial helicase domain of *DDX41* and the structure of *Drosophila Vasa* (PDB ID: 2DB3). The modeled structure was energy minimized using a combination of steepest descent and conjugate gradient methods. The final structure was refined for steric clashes. Structure was visualized in UCSF Chimera molecular extensible environment. Color scheme: RNA atoms: Gold; ATP: Green; Conserved motifs: Orange ribbons, significant residues: Red sphere.

(D) *DDX41* expression levels in del(5q) primary sAML cells and del(5q) primary cells with *DDX41* rescue were determined by RT-PCR (left). Differential colony counting of del(5q) primary cells compared to *DDX41* overexpressing del(5q) primary cells plated in methylcellulose. Colony numbers were assessed after 10-14 days. (\*p<.05). Each bar represents the mean±SEM of 3 independent experiments performed in duplicates (right).

(E) Flow cytometry analysis of Glycophorin A expression in *DDX41* knockdown K562 cells compared to control after treatment with apigetrin for 9 days. Mean fluorescence intensity (MFI) in mock cells untreated vs. treated = 8.3 vs. 18.5. MFI in sh-*DDX41* untreated vs. treated = 7.4 vs. 11.7.

(F) Differentiation state was evaluated by morphological changes using light microscopy (left and middle, scale bar: 20 μm) and Wright-Giemsa staining (right, scale bar: 10 μm.) of *DDX41* knockdown K562 cells compared to mock transduced cells after inducing erythroid differentiation with apigetrin. Arrows indicate mature erythroid cells.

(G) Expression of CD11b and CD14 in U937 with *DDX41* rescue and control cells was determined by FACS [MFI: 22.1 vs. 19 and 45.1 vs. 39.2, respectively (upper panel)]. Staining of apoptotic cells was performed in *DDX41* overexpressing

U937 cells compared to control cells: early apoptotic cells (Annexin V<sup>+</sup>/PI<sup>-</sup>: 2.07% vs. 0.51%), necrotic cells (Annexin V<sup>+</sup>/PI<sup>+</sup>: 3.81% vs. 2.89%) and dead cells (Annexin V<sup>+</sup>/PI<sup>+</sup>: 4.19% vs. 2.14%).

(H) *DDX41* deficiency in murine *lin<sup>-</sup>/sca-1<sup>+</sup>/c-kit<sup>+</sup>* (LSK) LSK cells. Left panel, representative Western blot analysis of *DDX41* and  $\beta$ -Actin protein in infected cells 72 hours after infection. Colony formation potential (mean $\pm$ SD) of purified murine LSK cells in the presence of SCF (100 ng/ml), IL-6 (10 ng/ml) and IL-3 (6 ng/ml) at 48 hours after infection with lentiviral *DDX41*-specific shRNA or control shRNA (NC-sh) constructs (middle panel). Right panel shows FACS analysis of c-kit and Gr-1 expression on murine LSK cells infected with *DDX41*-sh or NC-sh lentiviral shRNA constructs and passaged in culture in the presence of SCF (100 ng/ml), IL-6 (10 ng/ml) and IL-3 (6 ng/ml) for 7 days. Each bar represents the mean $\pm$ SEM of 3 independent experiments performed in duplicates.

(I) Docking of the *DDX3* helicase inhibitor (diaryl urea 1) in the RNA binding site of our computational model of *DDX41*. For the best docking pose of urea 1, the aniline group docks to a negatively charged pocket and forms a hydrogen bond with E480, whereas the methyl phenyl group interacts with a positively charged site of the binding pocket. The binding model indicates that urea 1 does not interact with *DDX41* optimally but suggests several opportunities for structural modifications that may improve its potency against *DDX41*.

(J) Left panel; expression level of *DDX41* in leukemic cell lines K562 and HL60 as determined by normalization to *GAPDH* upon knockdown of *DDX41*. Right panel; sensitivity to helicase inhibitor, compound 8 (C<sub>14</sub>H<sub>15</sub>N<sub>3</sub>O) of *DDX41* deficient cell lines (K562 and HL60) at 1  $\mu$ M and 10  $\mu$ M concentration was determined by *DDX41* mRNA expression levels and cell counts (\**p*<.05). Each bar represents the mean $\pm$ SEM of 3 independent experiments performed in duplicates.

(K) Chemical structure of small molecule *DDX3* inhibitor.

A

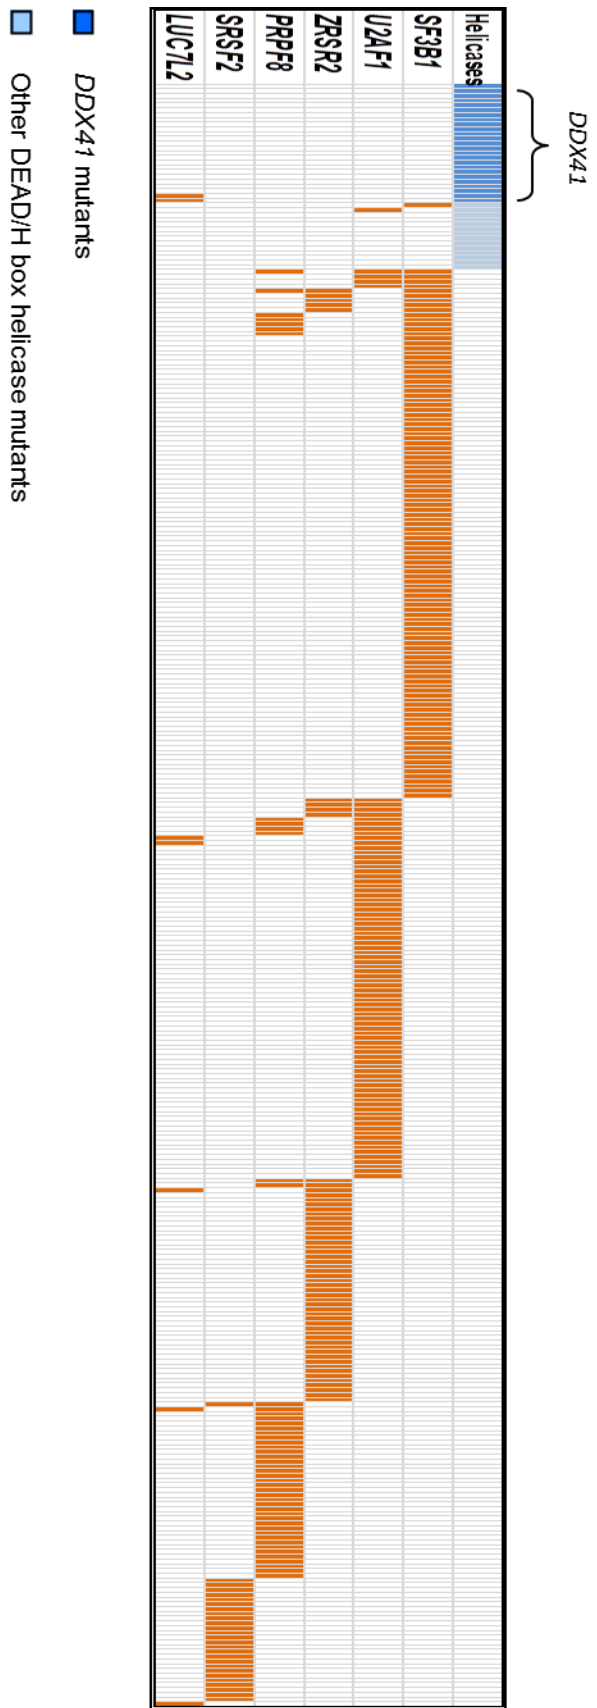

B

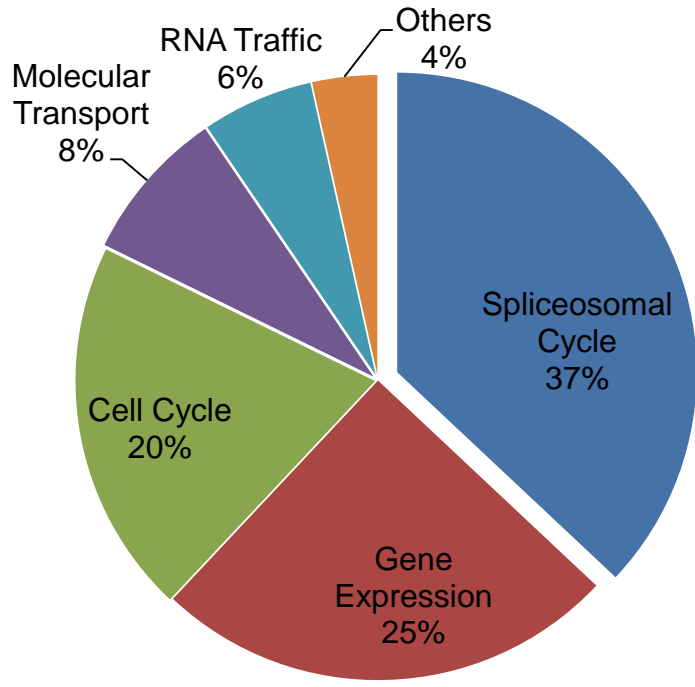

C

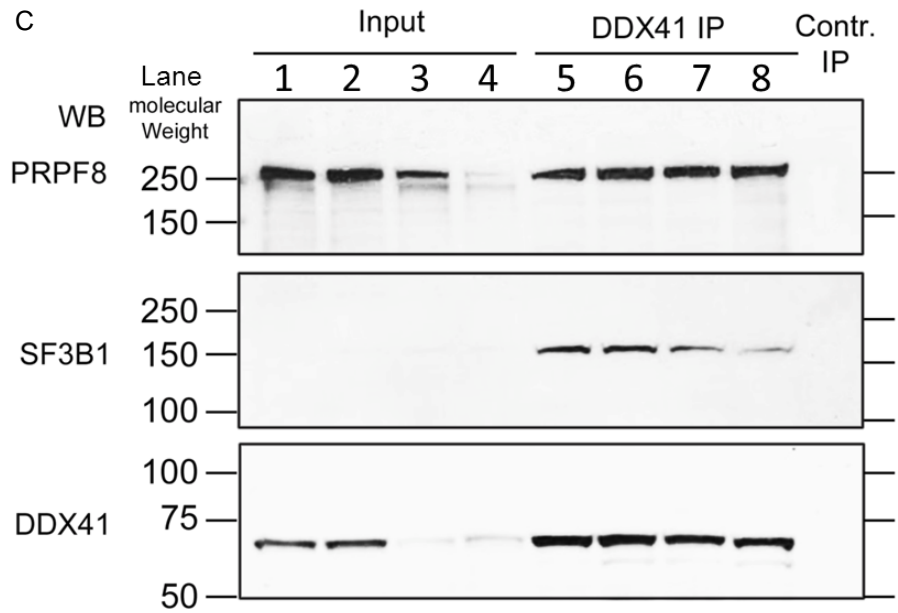

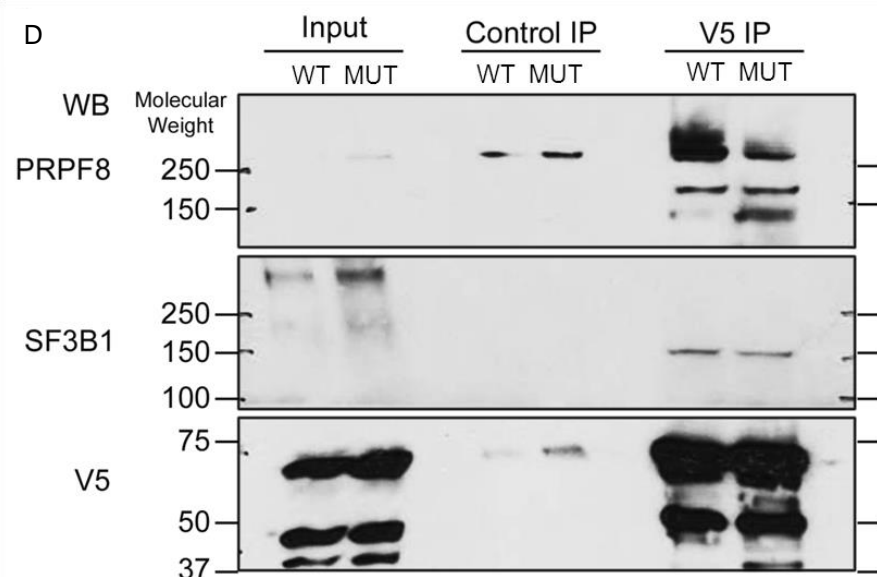

**Figure S6: Related to Figure 5.**

(A) Mutations of *DDX41*, other DEAD/H box helicases and spliceosomal genes (*U2AF1*, *SRSF2*, *ZRSF2*, *SF3B1*, *PRPF8* and *LUC7L2*) in our cohort (n=846) and TCGA database (n=197).

(B) Ingenuity based functional classification of the *DDX41* proteome. *DDX41* co-immunoprecipitated proteins were analyzed with Ingenuity software for functional pathway analysis. The relative frequencies of protein hits are assigned to functional categories. Overall, 96% of identified proteins clustered into five functional categories. Spliceosomal Cycle was the top functional group associated with *DDX41*.

(C) *DDX41* co-immunoprecipitation was analyzed by Western blot (WB) using antibodies against PRPF8 (Top panel), SF3B1 (Middle panel), and *DDX41* (Bottom panel). Lane 1-4 represented 5% of input from nuclear fractions of K562 cells obtained from individual cultures. Lane 5-8 represented *DDX41* co-immunoprecipitates obtained from corresponding cultures. Control IP (Contr. IP) using normal mouse IgG are shown on the right side of each panel.

(D) V5 Tagged wild-type *DDX41* (WT) and mutant (MUT) *DDX41* were expressed in HEK293 cells. Nuclear fractions from both wild-type and mutant cells were used for V5 co-immunoprecipitation. The result was analyzed by Western blot (WB) using antibodies against PRPF8 (Top panel), SF3B1 (Middle panel), and *DDX41* (Bottom panel). 5% of input of nuclear fractions of HEK293 cells are shown on the left side, control IP (Control IP) using normal mouse IgG are shown in the middle and *DDX41* co-immunoprecipitation is shown on the right side of each panel.

**Table S5: Related to Figure 5. Provided as an Excel file.**

A

Alignment of RNAseq reads (50bp) to a special, splice specific junction genome (hg18) using Bowtie

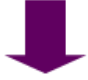

Removal of low quality sites (exons having less than 10 quality reads in more than 30%)

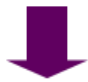

Quantification of valid, high quality reads (splicetrap software) and subsequent frequency estimation per each patient

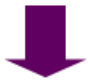

Statistical evaluation of frequency differences between *DDX41* defects and WT using T-Test ( $p < .05$ )

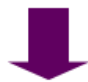

Removal of results having small (<10%) frequency difference between *DDX41* defects and WT

B

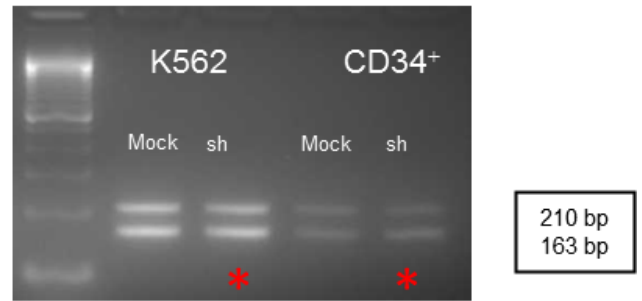

C

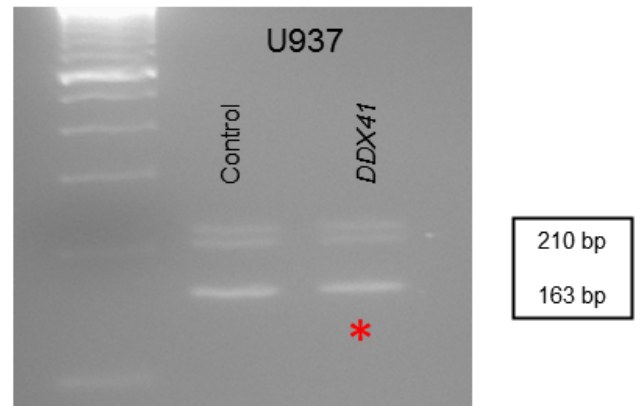

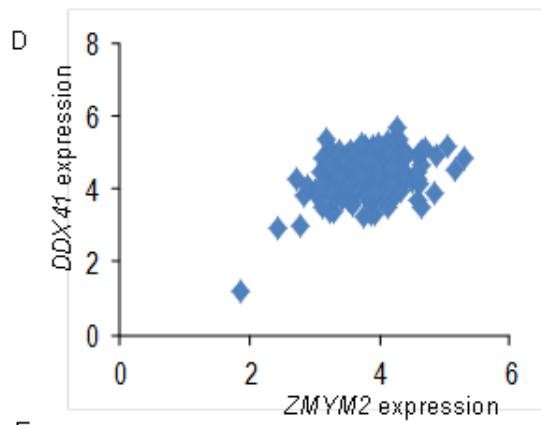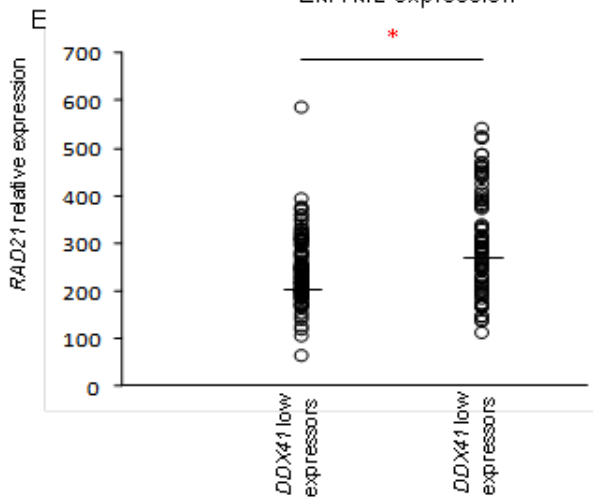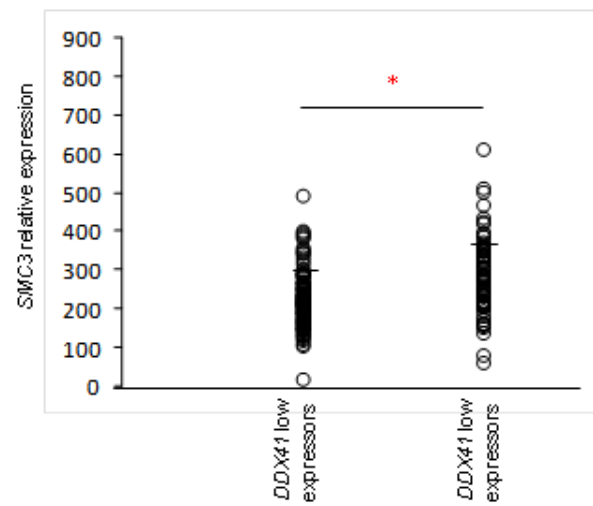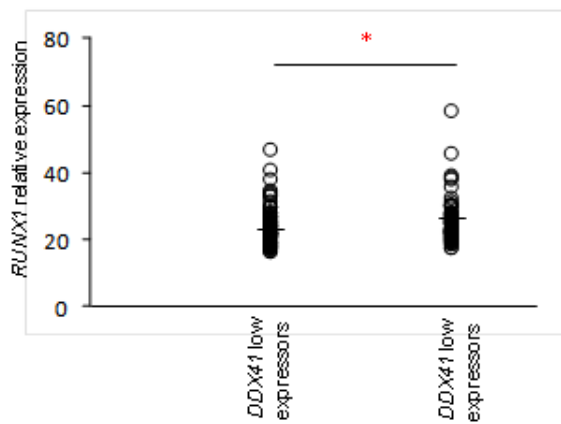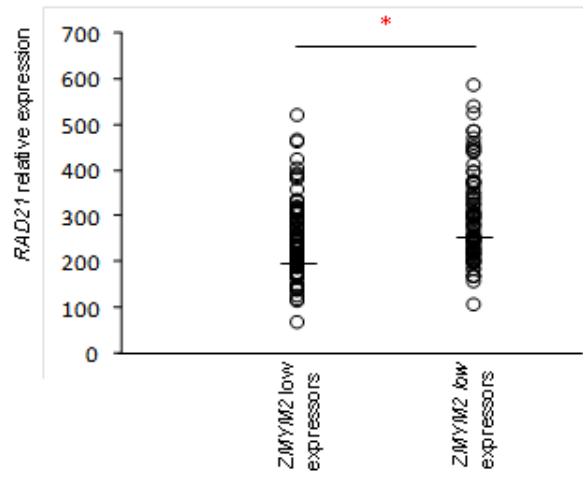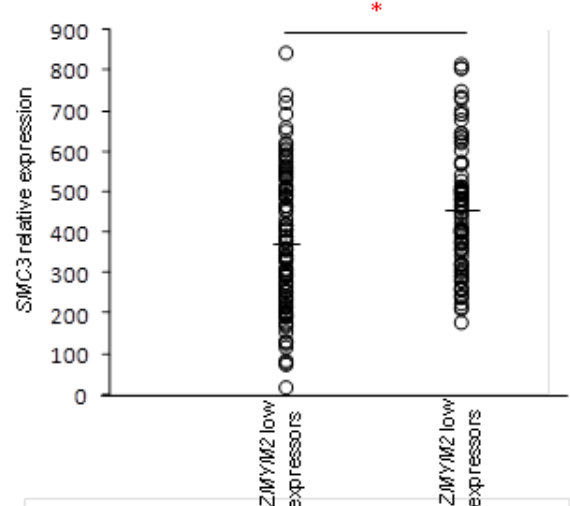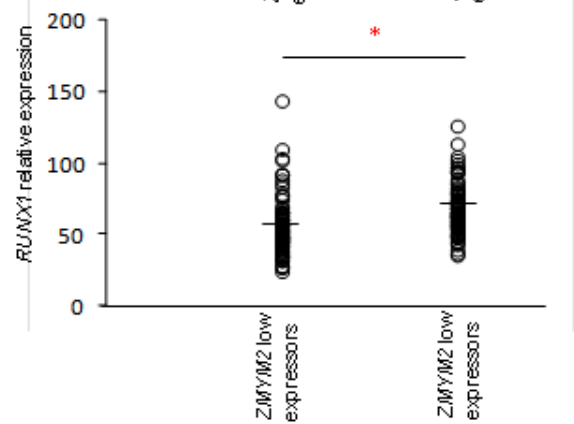

**Figure S7: Related to Figure 6.**

- (A) Work flow for the identification of candidate exons harboring differential exon usage between *DDX41* defects and WT.
- (B) PCR demonstrated skipping and retaining of exon 3 in *ZMYM2* in *DDX41* knockdown of K562 and CD34<sup>+</sup> progenitor cells compared with control. Asterisks indicate denser bands (more skipped exon) in sh-*DDX41*.
- (C) PCR demonstrated skipping and retaining of exon 3 in *ZMYM2* in *DDX41* overexpressing U937 cells. Asterisks indicate fainter bands (less skipped exon) in U937 cells with *DDX41* overexpression.
- (D) Correlation of *ZMYM2* and *DDX41* expression levels. ( $r=.38$ ,  $p<.001$ )
- (E) Down-modulation of *ZMYM2* and *DDX41* target genes *SMC3*, *RAD21*, *RUNX1* is depicted by expression levels in both, *DDX41* and *ZMYM2*, low and high expressors ( $*p<.05$ , high and low expressors were dichotomized by the mean of relative value (shown as bar) of mRNA transcription levels).



**Table S6: Related to Figure 6. List of misspliced genes from global differential pattern analysis.**

| Gene            | Wild-type skipping (%) | <i>DDX41</i> defect skipping (%) | Differences between Wild-type and <i>DDX41</i> defect | p value |
|-----------------|------------------------|----------------------------------|-------------------------------------------------------|---------|
| <i>LASS4</i>    | 51                     | 79                               | 28                                                    | 0.04    |
| <i>ABI2</i>     | 27                     | 52                               | 25                                                    | 0.001   |
| <i>LRRC27</i>   | 26                     | 50                               | 24                                                    | 0.04    |
| <i>SLC35A1</i>  | 12                     | 43                               | 31                                                    | 0.01    |
| <i>CASP1</i>    | 32                     | 52                               | 20                                                    | 0.04    |
| <i>SSH1</i>     | 25                     | 43                               | 18                                                    | 0.002   |
| <i>IKZF1</i>    | 32                     | 49                               | 17                                                    | 0.006   |
| <i>THEM4</i>    | 71                     | 87                               | 16                                                    | 0.02    |
| <i>CSNK1D</i>   | 75                     | 91                               | 16                                                    | 0.004   |
| <i>OSBPL9</i>   | 37                     | 53                               | 16                                                    | 0.01    |
| <i>SCYL3</i>    | 66                     | 82                               | 16                                                    | 0.04    |
| <i>UBXN11</i>   | 62                     | 77                               | 15                                                    | 0.01    |
| <i>FGFR10P</i>  | 67                     | 82                               | 15                                                    | 0.009   |
| <i>SFXN2</i>    | 7                      | 22                               | 15                                                    | 0.04    |
| <i>PHACTR4</i>  | 84                     | 99                               | 15                                                    | 0.01    |
| <i>AARSD1</i>   | 18                     | 32                               | 14                                                    | 0.04    |
| <i>SLC35B3</i>  | 6                      | 20                               | 14                                                    | 0.04    |
| <i>ANKMY1</i>   | 1                      | 15                               | 14                                                    | <0.001  |
| <i>C16orf35</i> | 59                     | 73                               | 14                                                    | 0.04    |
| <i>ZMYM2</i>    | 61                     | 74                               | 13                                                    | 0.02    |
| <i>ITGB3BP</i>  | 77                     | 40                               | 37                                                    | 0.03    |
| <i>PLB1</i>     | 35                     | 7                                | 28                                                    | 0.04    |
| <i>PILRB</i>    | 41                     | 14                               | 27                                                    | 0.001   |
| <i>RAG1AP1</i>  | 37                     | 12                               | 25                                                    | 0.005   |
| <i>PKP4</i>     | 69                     | 48                               | 21                                                    | 0.03    |
| <i>BTN3A3</i>   | 70                     | 49                               | 21                                                    | 0.005   |
| <i>MKL2</i>     | 32                     | 11                               | 21                                                    | 0.04    |
| <i>BRD8</i>     | 38                     | 18                               | 20                                                    | 0.01    |
| <i>L3MBTL</i>   | 21                     | 1                                | 20                                                    | 0.02    |
| <i>R3HDM1</i>   | 92                     | 73                               | 19                                                    | 0.02    |
| <i>DDB2</i>     | 44                     | 25                               | 19                                                    | 0.02    |
| <i>MLH3</i>     | 38                     | 19                               | 19                                                    | 0.02    |
| <i>METTL6</i>   | 61                     | 42                               | 19                                                    | 0.04    |
| <i>PPARA</i>    | 22                     | 4                                | 18                                                    | 0.03    |
| <i>SEC31A</i>   | 67                     | 49                               | 18                                                    | 0.01    |
| <i>CCNE1</i>    | 23                     | 5                                | 18                                                    | 0.03    |
| <i>MTRR</i>     | 84                     | 66                               | 18                                                    | 0.04    |
| <i>SRPK2</i>    | 27                     | 10                               | 17                                                    | 0.02    |
| <i>SCARF1</i>   | 36                     | 19                               | 17                                                    | 0.007   |
| <i>LYPLA1</i>   | 27                     | 11                               | 16                                                    | 0.005   |

## SUPPLEMENTAL EXPERIMENTAL PROCEDURES

### NGS STUDIES

Whole exome capture was accomplished based on liquid-phase hybridization of sonicated genomic DNA having 150 – 200 bp of mean length to the bait cRNA library synthesized on magnetic beads (SureSelect®, Agilent Technology), according to the manufacturer's protocol. The captured targets were subjected to massive sequencing using Illumina HiSeq 2000 with the pair end 75-108 bp read option, according to the manufacturer's instruction. The raw sequence data were processed through the in-house pipeline constructed for whole-exome analysis of paired cancer genomes at the Human Genome Center, Institute of Medical Science, University of Tokyo, which are summarized in a previous report (Yoshida et al., 2011). The data processing was divided into two steps, i) Generation of a bam file (<http://samtools.sourceforge.net/>) for paired normal and tumor samples for each case, ii) Detection of somatic point mutations and indels by comparing normal and tumor BAM files. Alignment of sequencing reads on hg19 was visualized using Integrative Genomics Viewer (IGV) software (<http://www.broadinstitute.org/igv/>) (Robinson et al., 2011). Each potential mutation was compared against databases of known SNPs, including Entrez Gene (<http://www.ncbi.nlm.nih.gov/gene>) and the Ensembl Genome Browser (<http://useast.ensembl.org/index.html>).

### TARGETED DEEP SEQUENCING

To detect allelic frequencies for mutations or SNPs, we applied deep sequencing to targeted exons as previously described (Yoshida et al., 2011). Briefly, we screened for possible mutations of *DDX41* and other genes that were concomitantly mutated in the cases with *DDX41* mutation (*DNMT3A*, *PHF6*, *JAK2*, *RUNX1*, *TP53*, *CDH26*, *CUX1*, *SUZ12*, *BCOR*, *SMC3* and *LUC7L2*). Each targeted exon was amplified with NotI linker attached to each primer as previous described (Yoshida et al., 2011). After digestion with NotI, amplicons were ligated with T4 DNA ligase and sonicated into fragments that were on average up to 200 bp in size using Covaris. Sequencing libraries were generated according to an Illumina paired-end library protocol and were subjected to deep sequencing on the Illumina Genome Analyzer Ix or HiSeq 2000 sequencers according to the standard protocol.

**List of 62 genes for targeted deep sequencing.**

| Genes          | ID           | Genes         | ID           |
|----------------|--------------|---------------|--------------|
| <i>APC</i>     | NM_001127511 | <i>KDM6A</i>  | NM_021140    |
| <i>ASXL1</i>   | NM_015338    | <i>KIT</i>    | NM_000222    |
| <i>BCOR</i>    | NM_001123384 | <i>KRAS</i>   | NM_004985    |
| <i>BCOR1L1</i> | NM_021946    | <i>MECOM</i>  | NM_001105078 |
| <i>BTRC</i>    | NM_001256856 | <i>MED12</i>  | NM_005120    |
| <i>LUC7L2</i>  | NM_016019    | <i>MLL</i>    | NM_001197104 |
| <i>CALR</i>    | NM_004343.3  | <i>NF1</i>    | NM_000267    |
| <i>CBL</i>     | NM_005188    | <i>NPM1</i>   | NM_199185    |
| <i>CDH23</i>   | NM_001171930 | <i>NRAS</i>   | NM_002524    |
| <i>CEBPA</i>   | NM_004364    | <i>OGT</i>    | NM_181672    |
| <i>CFTR</i>    | NM_000492    | <i>PHF6</i>   | NM_001015877 |
| <i>CSF1R</i>   | NM_005211    | <i>PRPF8</i>  | NM_006445    |
| <i>CSF3R</i>   | NM_156039.2  | <i>PTCH1</i>  | NM_001083603 |
| <i>CUX1</i>    | NM_001202543 | <i>PTPN11</i> | NM_002834    |
| <i>DDX41</i>   | NM_016222    | <i>RAD21</i>  | NM_006265.2  |
| <i>DDX54</i>   | NM_001111322 | <i>RNF25</i>  | NM_022453.2  |
| <i>DHX29</i>   | NM_019030    | <i>RUNX1</i>  | NM_001754.2  |
| <i>DNMT3A</i>  | NM_153759    | <i>SETBP1</i> | NM_015559    |
| <i>EED</i>     | NM_003797    | <i>SF3B1</i>  | NM_012433    |
| <i>ERBB4</i>   | NM_001042599 | <i>SIMC1</i>  | NM_198567    |
| <i>ETV6</i>    | NM_001987    | <i>SMC3</i>   | NM_005445    |
| <i>EZH2</i>    | NM_001203249 | <i>SRSF2</i>  | NM_001195427 |
| <i>FLT3</i>    | NM_004119    | <i>STAG2</i>  | NM_006603    |
| <i>GATA2</i>   | NM_001145662 | <i>STAT3</i>  | NM_003150    |
| <i>GLI1</i>    | NM_005269.2  | <i>SUZ12</i>  | NM_015355    |
| <i>GLI2</i>    | NM_005270    | <i>TET2</i>   | NM_001127208 |
| <i>GNB1</i>    | NM_002074    | <i>TP53</i>   | NM_001126115 |
| <i>IDH1</i>    | NM_005896.2  | <i>U2AF1</i>  | NM_001025203 |
| <i>IDH2</i>    | NM_002168.2  | <i>U2AF2</i>  | NM_001012478 |
| <i>IRF4</i>    | NM_001195286 | <i>WT1</i>    | NM_000378    |
| <i>JAK2</i>    | NM_004972    | <i>ZRSR2</i>  | NM_005089    |

**SANGER SEQUENCING AND ALLELE-SPECIFIC PCR**

Exons of selected genes were amplified and underwent direct genomic sequencing by standard techniques on the ABI 3730XL DNA analyzer (Applied Biosystems) as previously described (Dunbar et al., 2008; Jankowska et al., 2009; Makishima 2011). When a mutant allele with small burden was not confirmed by Sanger sequencing, cloning and sequencing of individual colonies (TOPO TA cloning, Invitrogen) was performed for validation. All mutations were

detected by bidirectional sequencing and were scored as pathogenic if not present in non-clonal paired DNA from CD3-selected cells (or buccal swab DNA). The allelic presence of p.Arg525His alteration was determined by allele-specific PCR.

#### Primers for *DDX41* sequencing and PCR specific for mutant alleles

| <i>DDX41</i> sequencing           |                              |
|-----------------------------------|------------------------------|
| Exon3_Forward                     | GACCGACGGCTTGATCTG           |
| Exon3_Reverse                     | CCTTCTCTTTAAGGTGCTGGT        |
| Exon5_Forward                     | CAGGCATGTTATATCTCAAGGGA      |
| Exon5_Reverse                     | GATGGGTAACAGGGATCAAGAG       |
| Exon6_Forward                     | GTATGTCTGTACAGTCTGCAGTT      |
| Exon6_Reverse                     | CCTTGAAGCTCTTGATGGGT         |
| Exon7_Forward                     | GGCTCTGAGAAAGTACCTGTG        |
| Exon7_Reverse                     | CAGAAGATGAAGGACACCTAGC       |
| Exon8_Forward                     | TGAGGAGGGCTGGAACA            |
| Exon8_Reverse                     | CGCGCTTTGAGAAGGGTAA          |
| Exon10_Forward                    | TGCCTGCTTGCCTCTAGATA         |
| Exon10_Reverse                    | TACGGATGTCACCCTCGAA          |
| Exon11_Forward                    | TGTCTCAGTTGCTCAGCTTC         |
| Exon11_Reverse                    | AATCAGCTTCAGGGAGACTTG        |
| Exon15_Forward                    | AGAGACTCTGTCCTTCTCTCTG       |
| Exon15_Reverse                    | CACCTTCTGCTTGGCTTCTA         |
| Exon11-15_Forward                 | CCAACCCACTGCTCATACTT         |
| Exon11-15_Reverse                 | CACCTTCTGCTTGGCTTCTA         |
| Allele specific PCR (p.Arg525His) |                              |
| <i>DDX41</i> _R525H_Forward_out   | GGGAANCATCAGGGCCCATCCTGGGCTC |
| <i>DDX41</i> _R525H_Reverse_out   | GCCTGGACTTCCCTGCCATCCAGCACGT |
| <i>DDX41</i> _R525H_Forward_in_C  | GTAGTGGCGATGCCTGTGTTTCCCGCGC |
| <i>DDX41</i> _R525H_Reverse_in_T  | AGTACACCGGATTGGCCGCACCGGTCA  |

#### List of genes and their annotation screened by Sanger sequencing

| Genes         | Ensembl cDNA sequence | Amino acid | Sequenced exons |
|---------------|-----------------------|------------|-----------------|
| <i>TP53</i>   | ENSG00000141510       | 302        | 4               |
| <i>DNMT3A</i> | ENSG00000119772       | 723        | 19              |
| <i>CDH26</i>  | ENSG00000124215       | 832        | 8               |
| <i>PHF6</i>   | ENSG00000156531       | 312        | 2               |
| <i>RUNX1</i>  | ENSG00000159216       | 453        | 1               |
| <i>JAK2</i>   | ENSG00000096968       | 1132       | 9               |

## PROLIFERATION ASSAYS

Cell growth was determined by counting cell numbers in culture. Briefly, 1 mL of  $5 \times 10^4$  cells were cultured in IMDM containing 10% fetal bovine serum in the six-well plates at day 0, and the cell numbers were scored by Trypan blue exclusion at 24, 48, 72, 96 and 120 hours.

## APIGETRIN INDUCED ERYTHROID DIFFERENTIATION (Tsolmon et al., 2011)

K562 cell line was transfected with lentiviruses carrying control shRNA, or *DDX41*-targeting shRNA, and cultured in IMDM medium supplemented with 10%v/v heat-inactivated fetal bovine serum at 37°C in a humidified 5% CO<sub>2</sub> incubator. Erythroid differentiation was induced by the addition of 75 μM apigetrin (Sigma) to both the control and sh-*DDX41* K562 cells ( $2 \times 10^4$  cells/mL). Medium and apigetrin (75 μM) were renewed every 3 days. DMSO-dissolved apigetrin at 100mM was stored at -20°C and was freshly diluted in culture medium immediately before use.

## BENZIDINE STAINING (Murphy, M.J. Jr. 1978)

Benzidine (Sigma) was prepared at 0.2% in 0.5 M acetic acid. The staining reagent consisted of 100 mL of the benzidine solution, to which 0.4 mL of 30% hydrogen peroxide was added just prior to use. One mL of this reagent was added to each petri dish and 5 minutes later, the dish was scored for the number of cells which were uniformly benzidine-unreactive (colorless), and uniformly benzidine-reactive (blue).

## APOPTOSIS ASSAYS

For analysis of apoptotic cells, the cells were stained with APC-conjugated anti-AnnexinV and propidium iodide (eBioscience, catalog no. 88-8007-74) as per the manufacturer's protocol. Sample analysis was performed on a flow cytometer (Beckman Coulter FC500).

## CELL SORTING

Following lysis of red blood cells, immunomagnetic selection of cells was performed using anti-CD34-FITC (Life Technologies) followed by anti-FITC microbeads (Miltenyi Biotec). Samples were separated using LS Columns (Miltenyi Biotec), and purity was verified in each fraction by flow cytometry on a Beckman Coulter FC500.

## GLOBAL DIFFERENTIAL SPLICING PATTERN ANALYSIS

We quantified exon inclusion ratios based on paired-end RNAseq data. SpliceTrap software (<http://rulai.cshl.edu/splicetrap/>) was used to quantify the frequency of inclusion of each exon (Wu et al., 2011) and extract counts of paired end reads that span each exon junction in the genome. For this purpose, each exon was tested for inclusion or exclusion with respect to adjacent exons. SpliceTrap considers individual exons in whole genomes and is not limited by analysis of known repository of transcripts. This unbiased method is a suitable approach for possible novel discovery of unknown/unexpected splicing variants. Each exon was tested with respect to adjacent exons. Within each triplet, each exon was labeled as A, B, and C; exon B being the one screened for every triplet in the transcriptome. According to this method, we counted reads spanning between exon A/B, B/C, and A/C, where reads spanning the A/C junction reflect the proportion of mRNA missing exon B. The sum of reads between exons A/B and B/C divided by 2 reflects the proportion of mRNA that contains exon B. In order to estimate the frequency of exon B skipping, we divided the number of reads spanning A/C by half of the sum of the reads spanning A/B and B/C. By following these guidelines, we extracted alternative splicing patterns for 16 patients (5 *DDX41* defect patients and 11 spliceosomal WT patients). Using the frequency of skipped reads to represent the skipping ratio is independent from variation in coverage between

different RNAseq samples and is a normalization step itself. The unpaired *t* test was used to assess the difference of exon usage between these 2 groups. For each exon tested we compared average exon usage between *DDX41* defects and the WT group, with associated *p* values generated. Statistical difference of *p*<.05 and average difference of  $\pm$  10% in frequency of exon usage was considered valid for an exon tested. Using this approach, we detected changes in exon skipping (excess of shorter mRNA missing an exon) as well as in exon retention (excess of longer mRNA incorporation an exon).

### **GENE KNOCKDOWN IN PURIFIED MOUSE LIN<sup>+</sup>SCA-1<sup>+</sup>C-KIT<sup>+</sup> (LSK) CELLS**

LSK cells are purified from C57BL/6 mice as previously described (Oakley et al. 2012). After culturing in DMEM with addition of 15% fetal bovine, murine SCF (100 ng/ml), IL-6 (6 ng/ml), and IL-3 (3 ng/ml) for 24 hours, LSK cells were infected twice (once daily) with pLKO.1 lentivirus containing shRNAs targeting *Ddx41* (Targeting sequences: sh1, 5'-GCCAAGATGGTGTACTTGCTT-3'; sh2, 5'-GCATCACCTATGACGATCCAA-3') or negative control shRNA (Sigma, SHC002). To generate infectious lentivirus, the corresponding constructs were co-transfected using Fugene 6 into 293T cells along with packaging plasmid  $\Delta$ 8.9 and a plasmid expressing VSV-G, and virus particles were harvested at 72 hours after transfection. Viral titers were calculated by infecting NIH-3T3 cells with serial dilutions of viral stocks and isolating puromycin resistant colonies. Lentiviral infections were performed twice by spinoculation in which a mixture of lentivirus and target cells at 4:1 ratio in 48-well or 24-well plates were centrifuged at 2000 x *g* for 90 minutes at 37°C. Puromycin (2  $\mu$ g/ml) was added to the infected cells 24 hours after the second infection. Colony formation assays were performed after another 24 hours using 2 x 10<sup>4</sup> puromycin resistant cells on IMDM methylcellulose medium supplemented with 15% horse serum, murine SCF (100 ng/ml), IL-6 (6 ng/ml), IL-3 (3 ng/ml) and puromycin (2  $\mu$ g/ml). Colony numbers were counted after 7 days.

### **LENTIVIRAL-MEDIATED DDX41 WT AND MUTANT OVEREXPRESSION**

QuikChange site directed mutagenesis kit (Agilent Technologies) was used to generate R525H mutant *DDX41* gene construct. In brief, the primer pair for generating the R525H mutation was designed using the web-based primer design program ([www.agilent.com/genomics/qcpd](http://www.agilent.com/genomics/qcpd)) and the primers obtained from IDT technologies (***DDX41-R525H-F***: CGCACCGGGCACTCGGGAAAC, ***DDX41-R525H-R***: GCCAATCCGGGTACATAGTTCTC). The mutagenesis PCR and the subsequent steps to generate R525H *DDX41* mutant vector were performed according to the kit instructions. Lentiviral expression vector expressing a C-terminal V5 epitope tagged wild-type or R525H mutant *DDX41* gene in pLX304 vector (Clone ID: HsCD00442077; DNASU Plasmid Repository) was used to generate the lentiviral supernatants in 293T cells as described above. The viral supernatant was used for infecting HEK293 cells in the presence of 8  $\mu$ g/mL polybrene for 24 hours. Subsequently, cells were selected with 10  $\mu$ g/ml of blasticidin for a week to obtain stably transfected cells overexpressing *DDX41*.

### **CELL FRACTIONATION AND NUCLEAR PROTEIN EXTRACTION**

V5 tagged *DDX41* was expressed in HEK293 cells. Approximately 5x10<sup>7</sup> of HEK293 cells were transferred to 15 ml conical tubes and washed twice with 10 ml of ice-cold 1x PBS that contained protease inhibitors (Sigma, A8340). Cells were resuspended in 500  $\mu$ l of 1x hypotonic buffer containing 10 mM HEPES, 1.5 mM MgCl<sub>2</sub>, 10 mM KCl, 0.5 mM dithiothreitol, 10 mM PMSF, and protease inhibitors (Sigma, A8340). A total of 20  $\mu$ l of 10% Nonidet P-40 was added to cell suspensions to break the cell membrane. After 5 minutes incubation on ice, cell suspensions were centrifuged at 344 x *g* for 10 minutes. The supernatant was transferred to clean tubes. Nuclear pellets were washed

twice with ice-cold PBS, and resuspended in 100  $\mu$ l of 50 mM Tris-HCl, pH 8.0, 1 mM MgCl<sub>2</sub>, 10 mM PMSF, protease inhibitor mixture (Sigma, A8340). Benzonase (Sigma, D5915, 250 units) was added to fragment DNA and RNA. The nuclear suspensions were incubated on ice for 90 minutes with vigorous vortexing every 5 minutes. At the end of the incubation, 500  $\mu$ l of protein extraction buffer containing 1.5% Nonidet P-40, 500 mM NaCl, 5 mM dithiothreitol, 10 mM PMSF, and 5  $\mu$ l of protease inhibitor mixture (Sigma, A8340) in 50mM phosphate buffer, pH 7.4, were added. After 30 minutes incubation on ice with vortexing every 5 minutes, the mixture was centrifuged at 12,396  $\times$  *g* for 15 minutes. The same extraction process was repeated twice with 300 and 200  $\mu$ l of extraction buffer, respectively. The supernatant containing nuclear proteins was combined and transferred to clean tubes, and the protein concentration was determined by BCA assay.

#### **COVALENT BOUND ANTIBODY TO PROTEIN G BEADS**

Rabbit anti-V5 and control rabbit IgG were covalently coupled to Sepharose-protein G beads using dimethylpimelimidate. Briefly, 25 mg of protein G-Sepharose CL-4B (GE Healthcare, 17-0780-01) was swelled in 1 ml of PBS overnight and incubated with 200  $\mu$ l of antibody (50  $\mu$ g) solution (1 $\times$  PBS) for 1 hour at room temperature. Antibody bound protein G beads were then incubated with 1% chicken egg ovalbumin in PBS for another hour to block nonspecific binding sites. After 3 washes with PBS, 25 mg of dimethylpimelimidate in 1 ml of 200 mM triethanyl amine was added, and the coupling reaction proceeded at room temperature for 30 minutes. The reaction was repeated 2 more times with fresh addition of dimethylpimelimidate and quenched with 50mM ethanol amine. The reacted protein G beads were washed extensively with PBS before immunoprecipitation.

#### **PROTEIN IDENTIFICATION BY LC-MS/MS**

Anti-V5 and isotype antibody immunoprecipitation products were subjected to SDS-polyacrylamide gel electrophoresis and stained with colloidal Coomassie Blue (Gel Code Blue, Pierce Chemical). Gel slices were excised from the top to the bottom of the lane; proteins were reduced with dithiothreitol (10 mM), alkylated with iodoacetamide (55 mM), and digested *in situ* with trypsin. Peptides were extracted from gel pieces 3 times using 60% acetonitrile and 0.1% formic acid/water. The dried tryptic peptide mixture was re-dissolved in 15  $\mu$ l of 0.1% formic acid and 5% acetonitrile for mass spectrometric analysis. Tryptic peptide mixtures were analyzed by on-line LC-coupled tandem mass spectrometry (LC-MS/MS) on a Orbitrap mass spectrometer (Thermo), a 0.3  $\times$  5-mm trapping column (C18 PepMap 100, LC Packings), a reverse phase separating column (75  $\mu$ m  $\times$  5 cm, Vydac C18), and a flow rate of 250 nl/min. Gradient LC separation was achieved with aqueous formic acid/acetonitrile solvents. The Orbitrap mass spectrometer was operated in standard MS/MS switching mode with the 4 most intense ions in each survey scan subjected to MS/MS analysis. Instrument operation and data acquisition used Thermo Xcalibur software. Initial protein identifications from MS/MS data used the Mascot search engine and the Swiss Protein Human sequence database. The Swiss Protein database search parameters included the allowed 2 missed tryptic cleavage sites, precursor ion mass tolerance of 10ppm, fragment ion mass tolerance of 0.6 Da, protein modifications for Met oxidation, and Cys carbamidomethylation. A minimum Mascot ion score of 25 was used for automatically accepting all peptide MS/MS spectra. A Mascot-integrated decoy database search calculated a false discovery of  $\leq$ 3.55% when searching was performed on the concatenated mgf files with an ion score cut-off of 25 and a significance threshold of  $p \leq .01$ . Only peptides with ion scores of  $\geq$  25 and only proteins with at least two unique peptide ranked as a top candidate (bold red in Mascot) were accepted.

## PROTEIN NETWORK ANALYSIS

The “core analysis” function included in IPA (Ingenuity System Inc.) was used to interpret the data in the context of biological processes, pathways, and networks. All identifier types were selected because more than one type of identifier exists in our dataset (working file). Only direct interaction was chosen for analysis.

## SUPPLEMENTAL REFERENCES

Cheson, B.D., Bennett, J.M., Kantarjian, H., Pinto, A., Schiffer, C.A., Nimer, S.D., Löwenberg, B., Beran, M., Witte, T.M., Stone, R.M., et al. (2000). Report of an international working group to standardize response criteria for myelodysplastic syndromes. *Blood*. 96, 3671-4.

Dunbar, A.J., Gondek, L.P., O'Keefe, C.L., Makishima, H., Rataul, M.S., Szpurka, H., Sekeres, M.A., Wang, X.F., McDevitt, M.A., Maciejewski, J.P. (2008). 250K single nucleotide polymorphism array karyotyping identifies acquired uniparental disomy and homozygous mutations, including novel missense substitutions of *c-Cbl*, in myeloid malignancies. *Cancer Res*. 68, 10349-10357.

Jankowska, A.M., Szpurka, H., Tiu, R.V., Makishima, H., Afable, M., Huh, J., O'Keefe, C.L., Ganetzky, R., McDevitt, M.A., Maciejewski, J.P. (2009). Loss of heterozygosity 4q24 and *TET2* mutations associated with myelodysplastic/myeloproliferative neoplasms. *Blood* 113, 6403-6410.

Makishima, H., Jankowska, A.M., McDevitt, M.A., O'Keefe, C., Dujardin, S., Cazzolli, H., Przychodzen, B., Prince, C., Nicoll, J., Siddaiah, H., et al. (2011). *CBL*, *CBLB*, *TET2*, *ASXL1*, and *IDH1/2* mutations and additional chromosomal aberrations constitute molecular events in chronic myelogenous leukemia. *Blood* 117, e198-e206.

Murphy, M.J. Jr. (1978). *In Vitro Aspects of Erythropoiesis* (New York: Springer-Verlag).

Robinson, J.T., Thorvaldsdóttir, H., Winckler, W., Guttman, M., Lander, E.S., Getz, G., Mesirov, J.P. (2011). Integrative genomics viewer. *Nat. Biotechnol.* 29, 24-26.

Tsolmon, S., Nakaziki, E., Han, J. & Isoda, H. (2011). Apigenin induces erythroid differentiation of human leukemia cells K562: Proteomics approach. *Mol. Nutr. Food Res.* 55, S93-S102.

Wu, J., Akerman, M., Sun, S., McCombie, W.R., Krainer, A.R., Zhang, M.Q. (2011). SpliceTrap: a method to quantify alternative splicing under single cellular conditions. *Bioinformatics* 27, 3010-3016.
